# Supplementary material for: Large-scale phylogenomics reveals ancient introgression in Asian Hepatica and new insights into the origin of the insular endemic Hepatica maxima
Source: PubMed Central journal article supplement (PMC7529770; doi:10.1038/s41598-020-73397-2), 2020-10-01
Supplement: 41598_2020_73397_MOESM1_ESM.pdf [file 41598_2020_73397_MOESM1_ESM.pdf]

**Article title:** Large-scale phylogenomics reveals ancient introgression in Asian *Hepatica* and new insights into the origin of the insular endemic *Hepatica maxima*

**Authors:** Seongjun Park and SeonJoo Park

### **Supplementary information**

**Figure S1.** Prediction of transmembrane helices in ORFs that contain a mitochondrial gene.

**Figure S2.** Mitochondrial genomic map surrounding the *orf296*.

**Figure S3.** Structural alignments of tribe Anemonea plastomes using Mauve.

**Figure S4.** Phylogenetic relationships among 5 species of the Asian *Hepatica* with two outgroups.

**Figure S5.** Chronogram of the Asian *Hepatica* divergence times.

**Table S1.** Blast result of plastid-derived DNA segments in the mitochondrial genome of *Hepatica maxima*.

**Table S2.** Predicted RNA editing in 39 protein-coding genes for the *Hepatica maxima* mitochondrial genome.

**Table S3.** Potential chimeric ORFs.

**Table S4.** General characteristics of newly sequenced plastomes.

**Table S5.** Organellar genes included in phylogenomic analyses.

**Table S6.** Transit peptide prediction scores of putative nuclear-encoded plastid and mitochondrial genes with GenBank accession numbers.

**Table S7.** General characteristics of nuclear orthologs .

**Table S8.** Scores of each criterion calculated by TreSpEx.

**Table S9.** Model selection between species networks.

### Figure S1. Prediction of transmembrane helices in ORFs that contain a mitochondrial gene.

Transmembrane helices are indicated by vertical red lines. The inside and outside represents the orientation of helices relative to the mitochondrial membrane

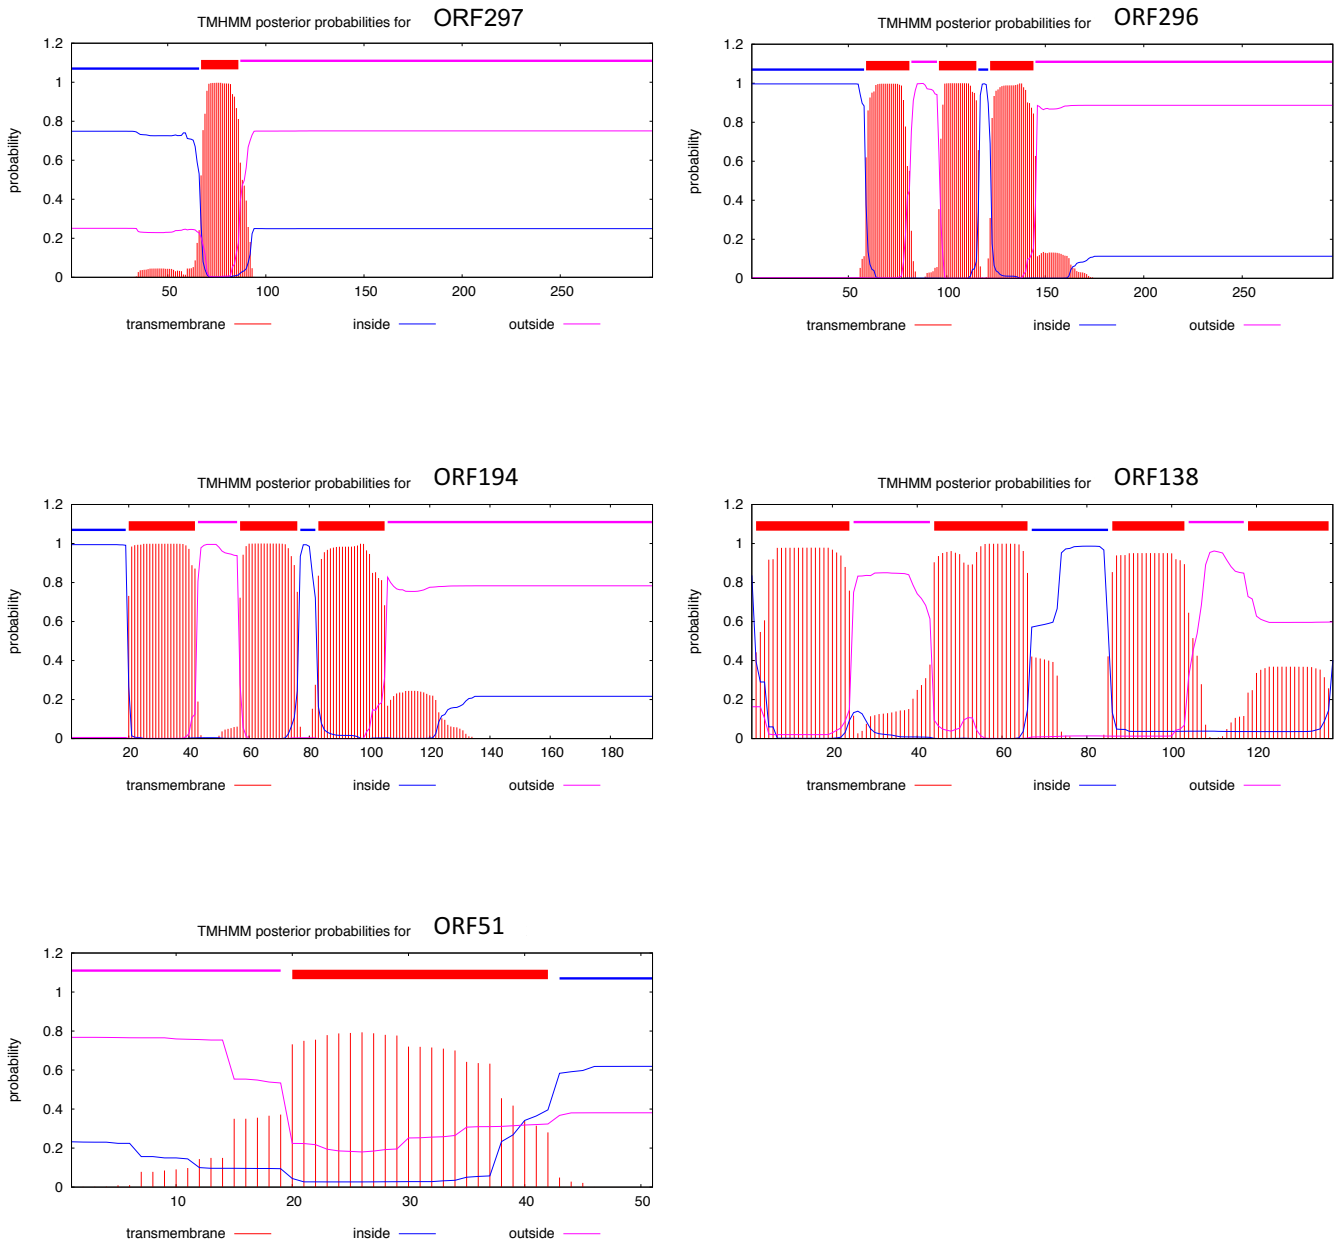

**Figure S2. Mitochondrial genomic map surrounding the *orf296*.**

The three repeats are shown in black. The repeats are shown in all nine possible arrangements. Transmembrane helices are indicated by vertical red lines. The inside and outside represents the orientation of helices relative to the mitochondrial membrane (see Supplementary Fig. S1 for more detail). The figures were constructed in OGDRAW v1.3.1 (<https://chlorobox.mpimp-golm.mpg.de/OGDraw.html>) and Inkscape v0.92.2 (<https://inkscape.org>).

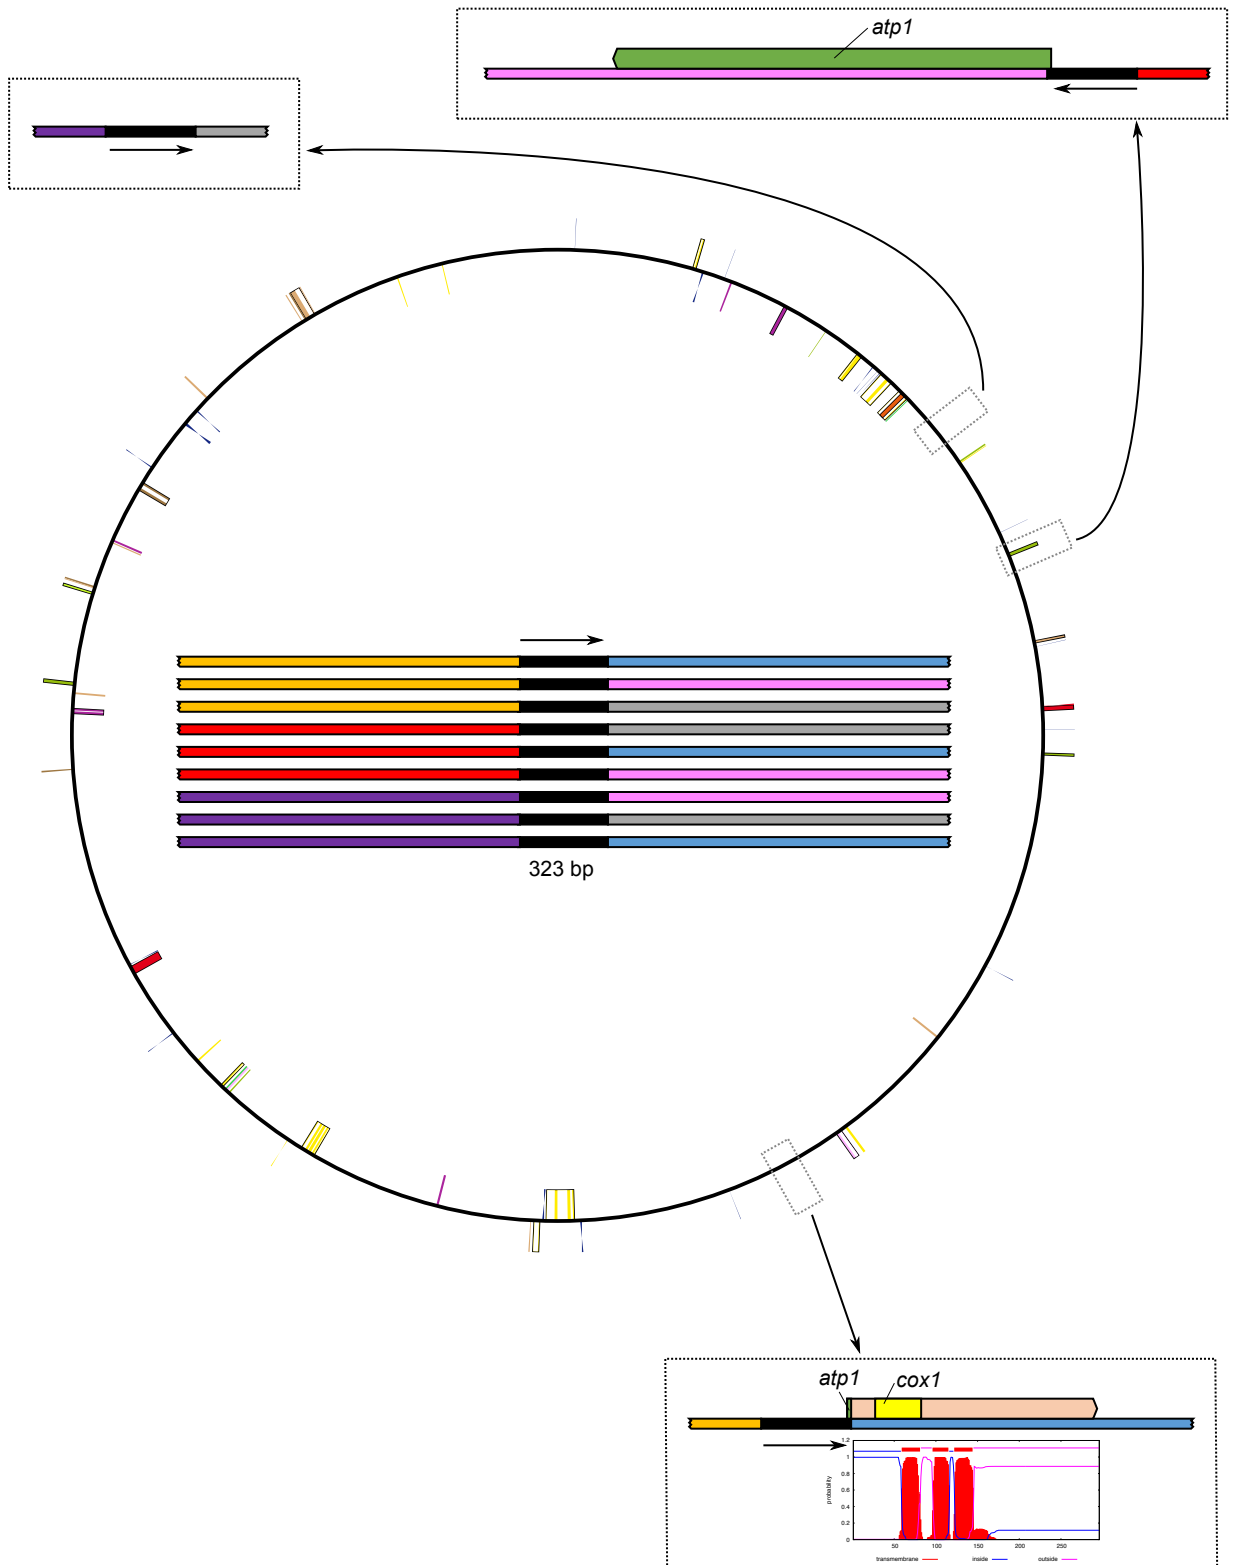

### Figure S3. Structural alignments of tribe Anemonea plastomes using Mauve.

The colored blocks represent collinear sequence blocks shared by all plastomes. Blocks drawn below the horizontal line indicate sequences found in an inverted orientation. Individual genes and strandedness are represented below the *Ranunculus* genome block. Only one copy of the inverted repeat (IR) is shown for each plastome and pink boxes below each plastome block indicate its IR. The figures were constructed using Mauve v2.3.1 (<http://darlinglab.org/mauve/mauve.html>) in Geneious R7 v7.1.8 (<https://www.geneious.com>).

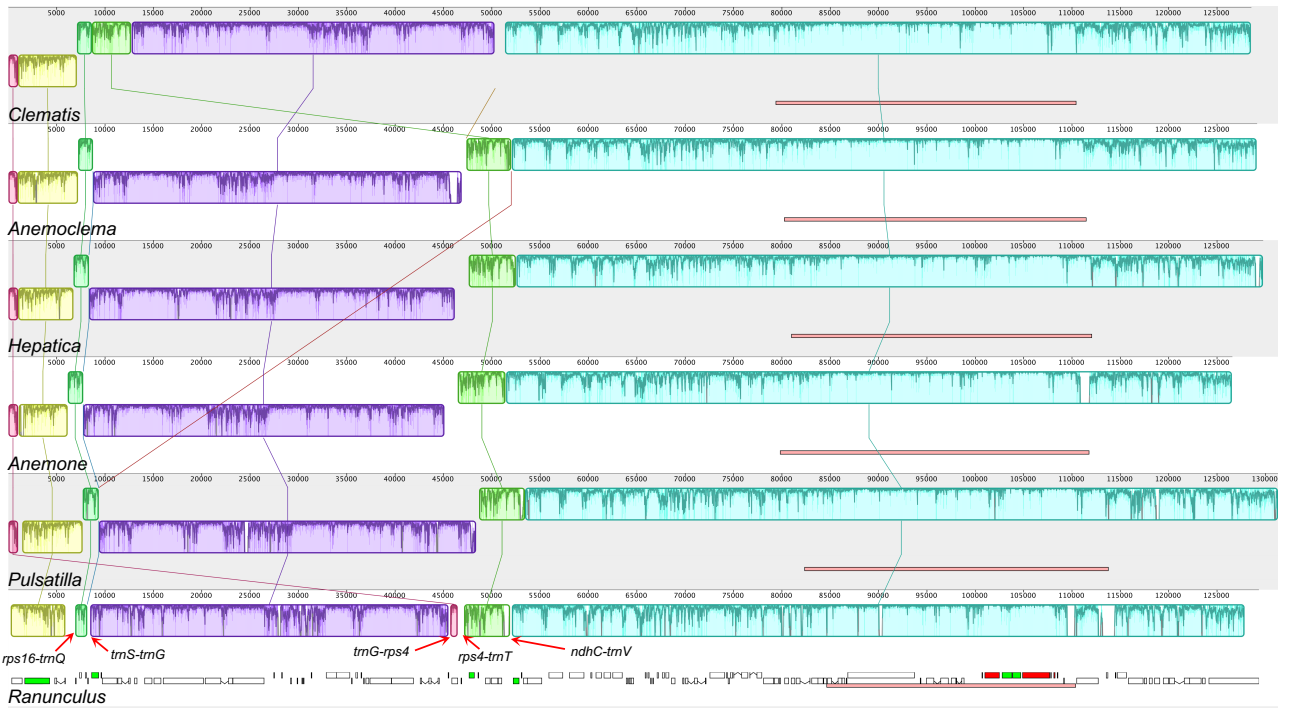

**Figure S4. Phylogenetic relationships among 5 species of the Asian *Hepatica* with two outgroups.** The maximum likelihood tree was constructed using nucleotide sequence of 413 nuclear (A), 76 plastid (B) and 37 mitochondrial (C) genes, respectively. Bootstrap support values > 50% are shown at nodes. The figures were constructed in IQ-TREE v2.0 (<http://www.iqtree.org/>).

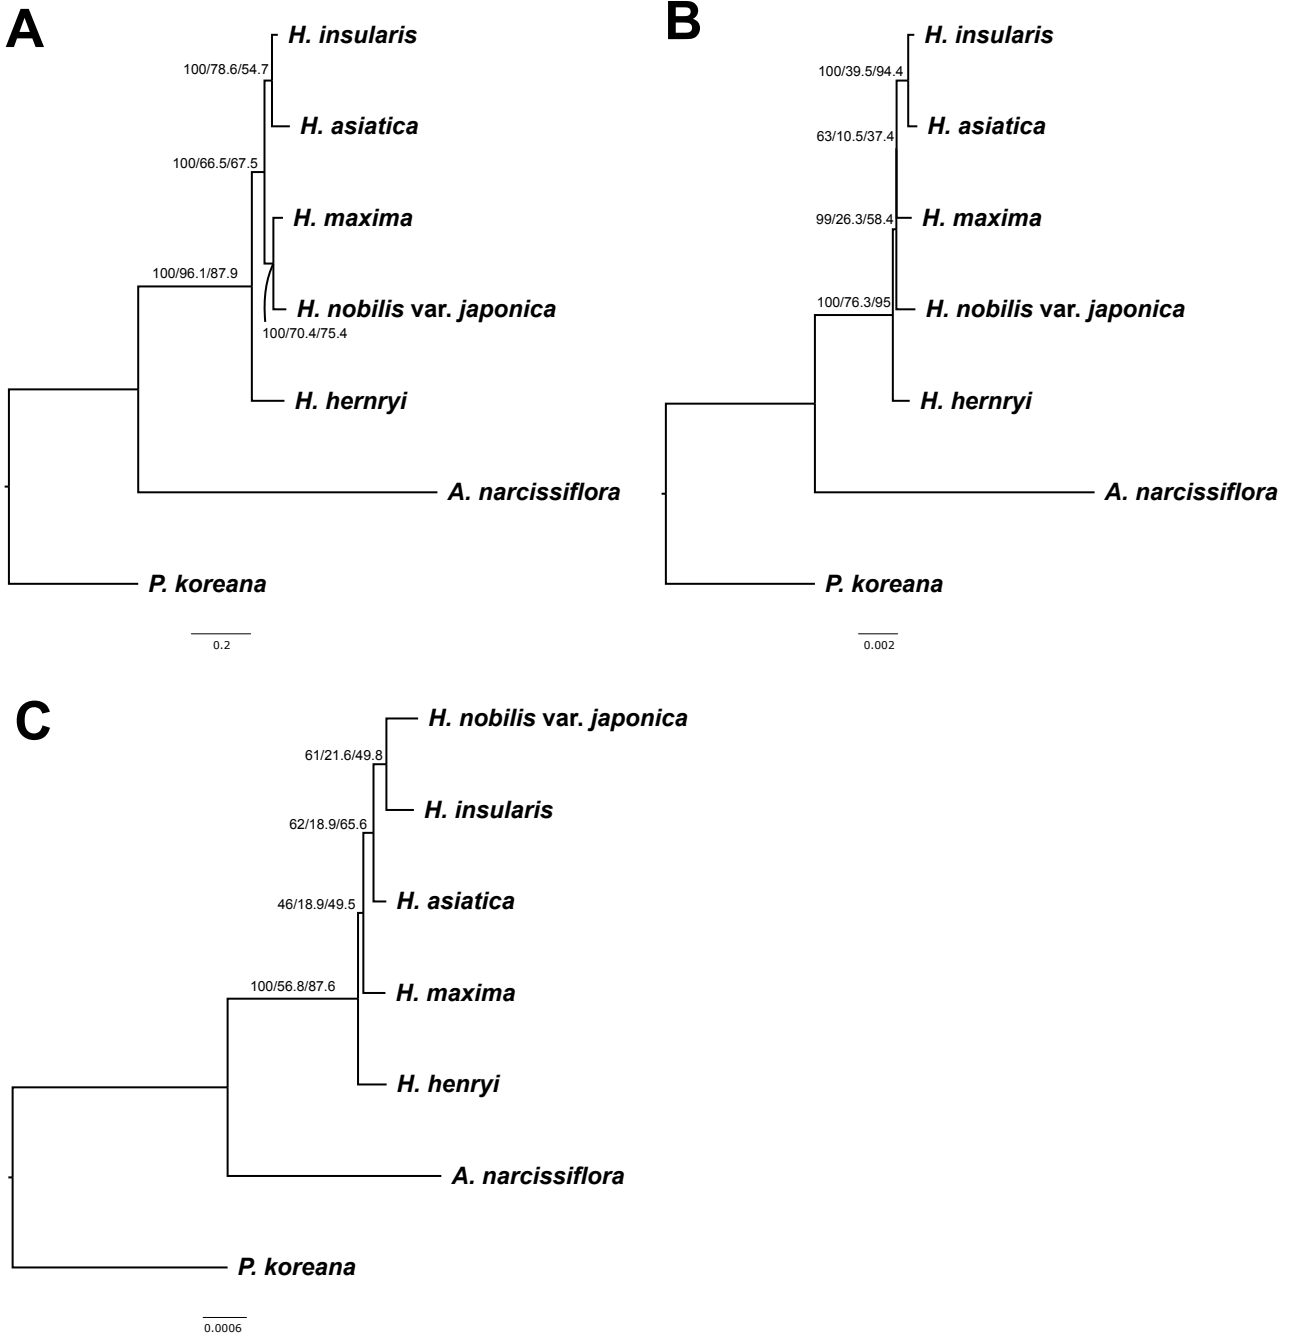

**Figure S5. Chronogram of the Asian *Hepatica* divergence times.** Times shown are the median age estimates from the BEAST analysis (blue bars indicate 95% highest posterior density [HPD] intervals). The figures were constructed in BEAST2 v2.6.2 (<https://www.beast2.org/>).

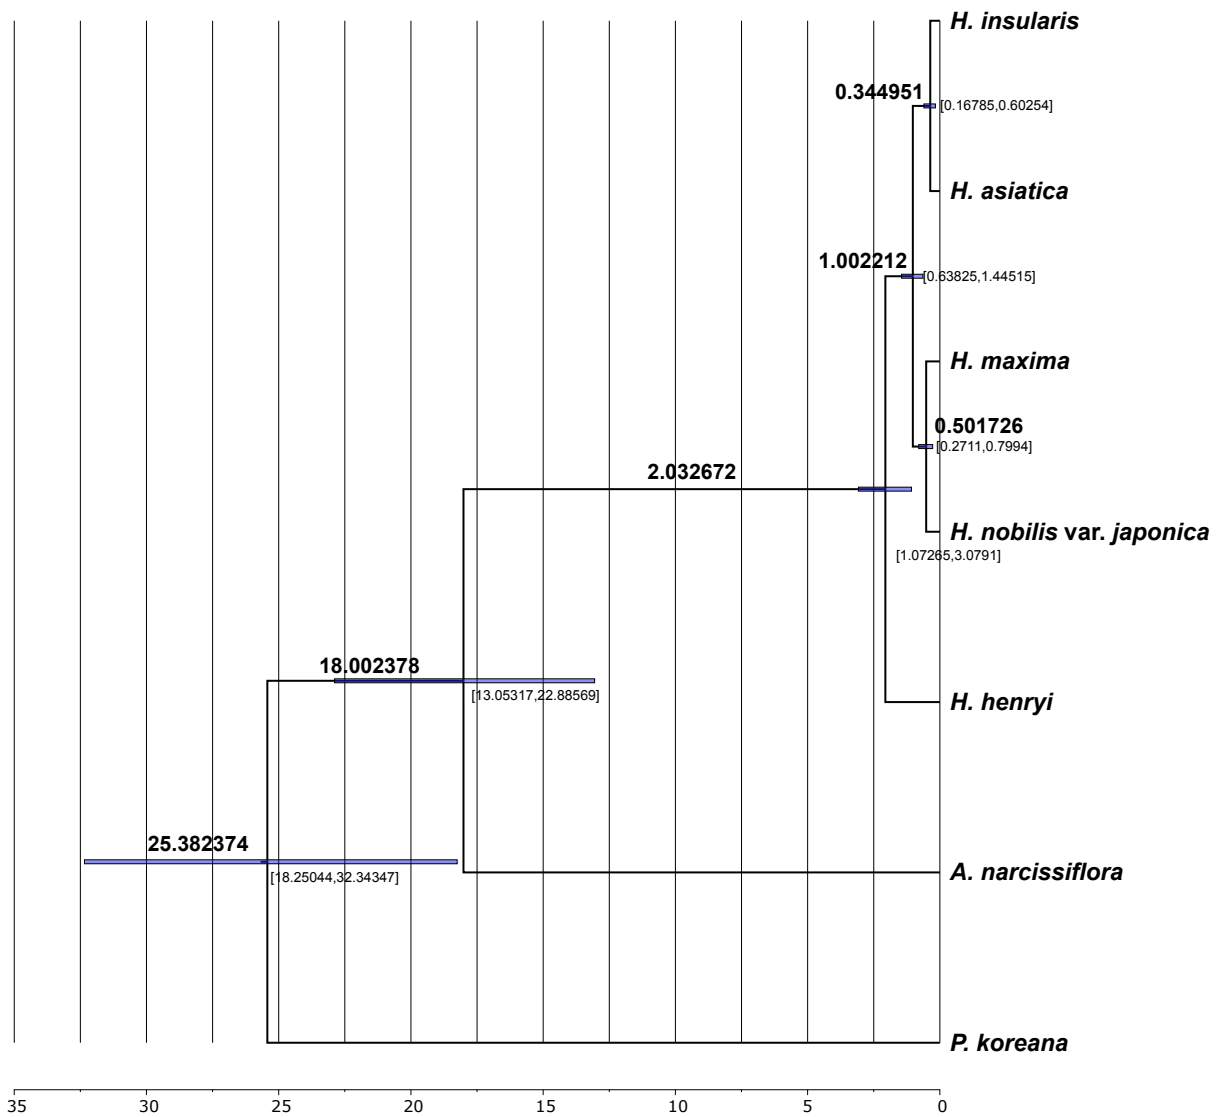

**Supplementary Table S1.** Blast result of plastid-derived DNA segments in the mitochondrial genome of *Hepatica maxima*.

Asterisks indicate fragments.

|    | Mt-length | Pt-length | Identigy | Aligned length | Query start | Query end | Hit start | Hit end | E value  | Bit-score | Annotated plastid genes                            |
|----|-----------|-----------|----------|----------------|-------------|-----------|-----------|---------|----------|-----------|----------------------------------------------------|
| 1  | 7104      | 7103      | 99.339   | 7108           | 12340       | 19442     | 107497    | 114600  | 0        | 12857     | psaA*, psaB, rps14, trnfM, trnG, psbZ, trnS, psbC* |
| 2  | 5680      | 5680      | 99.982   | 5680           | 132849      | 138528    | 963119    | 957440  | 0        | 10484     | trnI, trnA, 23S rRNA, 4.5S rRNA, 5S rRNA           |
| 3  | 895       | 952       | 80.992   | 968            | 67127       | 68078     | 907075    | 906181  | 0        | 686       | trnP, trnW, petG, petL                             |
| 4  | 884       | 884       | 99.548   | 884            | 101755      | 102638    | 583440    | 582557  | 0        | 1611      | 16S rRNA*                                          |
| 5  | 643       | 651       | 97.081   | 651            | 19631       | 20281     | 883235    | 882593  | 0        | 1090      | psbC*, psbD*                                       |
| 6  | 214       | 208       | 87.383   | 214            | 10474       | 10681     | 356013    | 355800  | 4.50E-62 | 241       | ycf3 intron2*                                      |
| 7  | 166       | 161       | 90.964   | 166            | 23782       | 23942     | 850512    | 850677  | 2.11E-55 | 219       | trnD                                               |
| 8  | 148       | 158       | 83.019   | 159            | 28848       | 29005     | 871312    | 871459  | 7.85E-30 | 134       | rpoB*                                              |
| 9  | 104       | 104       | 89.423   | 104            | 154421      | 154524    | 274099    | 273996  | 2.82E-29 | 132       |                                                    |
| 10 | 102       | 102       | 94.118   | 102            | 88025       | 88126     | 810091    | 809990  | 1.68E-36 | 156       | ycf2*                                              |
| 11 | 86        | 75        | 84.884   | 86             | 87501       | 87575     | 274266    | 274181  | 1.34E-12 | 76.8      | trnI                                               |
| 12 | 84        | 83        | 95.238   | 84             | 131821      | 131903    | 152020    | 151937  | 2.82E-29 | 132       | trnN                                               |
| 13 | 82        | 80        | 80.488   | 82             | 59598       | 59677     | 872114    | 872195  | 3.76E-08 | 62.1      | accD*                                              |
| 14 | 80        | 80        | 97.5     | 80             | 6886        | 6965      | 836794    | 836715  | 6.07E-31 | 137       | trnH(GUG)                                          |
| 15 | 76        | 78        | 92.308   | 78             | 6887        | 6964      | 436560    | 436485  | 1.32E-22 | 110       | trnH(GUG)                                          |
| 16 | 72        | 72        | 82.667   | 75             | 117893      | 117964    | 31025     | 30954   | 3.76E-08 | 62.1      | ycf1*                                              |
| 17 | 75        | 75        | 86.667   | 75             | 151327      | 151401    | 692214    | 692140  | 8.02E-15 | 84.2      | ycf2*                                              |

|    |    |    |        |    |        |        |         |         |          |      |                           |
|----|----|----|--------|----|--------|--------|---------|---------|----------|------|---------------------------|
| 18 | 75 | 72 | 92     | 75 | 22382  | 22453  | 850260  | 850334  | 2.21E-20 | 102  | trnT                      |
| 19 | 75 | 75 | 93.333 | 75 | 53734  | 53808  | 1034272 | 1034346 | 3.68E-23 | 111  | trnM                      |
| 20 | 73 | 73 | 93.151 | 73 | 75138  | 75210  | 67018   | 66946   | 4.76E-22 | 108  | psbB*                     |
| 21 | 73 | 73 | 93.151 | 73 | 75138  | 75210  | 114840  | 114912  | 4.76E-22 | 108  | psbB*                     |
| 22 | 73 | 73 | 93.151 | 73 | 75138  | 75210  | 929634  | 929562  | 4.76E-22 | 108  | psbB*                     |
| 23 | 69 | 69 | 82.857 | 70 | 105869 | 105937 | 653600  | 653532  | 3.76E-08 | 62.1 | 23S rRNA*                 |
| 25 | 61 | 61 | 86.885 | 61 | 140008 | 140068 | 8934    | 8874    | 2.24E-10 | 69.4 | 16S rRNA*                 |
| 26 | 61 | 61 | 86.885 | 61 | 101807 | 101867 | 176307  | 176247  | 2.24E-10 | 69.4 | 16S rRNA*                 |
| 27 | 54 | 54 | 98.148 | 54 | 96538  | 96591  | 101217  | 101164  | 3.70E-18 | 95.3 | ndhB intron*              |
| 28 | 54 | 54 | 100    | 54 | 101446 | 101499 | 1119593 | 1119540 | 7.96E-20 | 100  |                           |
| 29 | 51 | 51 | 88.235 | 51 | 138596 | 138646 | 10526   | 10476   | 3.76E-08 | 62.1 | 16S rRNA*                 |
| 30 | 51 | 50 | 90.196 | 51 | 32260  | 32309  | 230294  | 230344  | 2.90E-09 | 65.8 | rpoC1 intron*/nad5 intron |

---



**Supplementary Table S2.** Predicted RNA editing in 39 protein-coding genes for the *Hepatica maxima* mitochondrial genome.

| Sequence Name | Length | RNA editing | Sequence Name | Length | RNA editing |
|---------------|--------|-------------|---------------|--------|-------------|
| <i>atp1</i>   | 1,548  | 3           | <i>nad5</i>   | 2,013  | 36          |
| <i>atp4</i>   | 564    | 14          | <i>nad6</i>   | 825    | 17          |
| <i>atp6</i>   | 1,140  | 25          | <i>nad7</i>   | 1,185  | 38          |
| <i>atp8</i>   | 486    | 5           | <i>nad9</i>   | 573    | 12          |
| <i>atp9</i>   | 225    | 1           | <i>rpl2</i>   | 1,536  | 5           |
| <i>ccmB</i>   | 621    | 40          | <i>rpl5</i>   | 558    | 9           |
| <i>ccmC</i>   | 744    | 37          | <i>rpl10</i>  | 489    | 5           |
| <i>ccmFc</i>  | 1,356  | 23          | <i>rpl16</i>  | 516    | 9           |
| <i>ccmFn</i>  | 1,734  | 40          | <i>rps1</i>   | 690    | 3           |
| <i>cob</i>    | 1,182  | 22          | <i>rps2</i>   | 711    | 7           |
| <i>cox1</i>   | 1,587  | 28          | <i>rps3</i>   | 1,695  | 14          |
| <i>cox2</i>   | 765    | 15          | <i>rps4</i>   | 1,188  | 20          |
| <i>cox3</i>   | 798    | 19          | <i>rps7</i>   | 447    | 2           |
| <i>matR</i>   | 1,971  | 20          | <i>rps11</i>  | 771    | 4           |
| <i>mttB</i>   | 815    | 34          | <i>rps12</i>  | 378    | 10          |
| <i>nad1</i>   | 787    | 33          | <i>rps13</i>  | 351    | 6           |
| <i>nad2</i>   | 1,467  | 35          | <i>rps19</i>  | 288    | 3           |
| <i>nad3</i>   | 357    | 18          | <i>sdh3</i>   | 336    | 2           |
| <i>nad4</i>   | 1,488  | 57          | <i>sdh4</i>   | 567    | 5           |
| <i>nad4L</i>  | 273    | 12          |               |        |             |

**Supplementary Table S3.** Potential chimeric ORFs.

|    |               | ORF<br>start  | ORF<br>end    | ORF<br>length | Identity      | ORF<br>hit<br>start | ORF<br>hit<br>end | Chimera<br>length | Gene<br>hit<br>start | Gene<br>hit<br>end | E-value         | Gene               | No of Transmembrane<br>helices / probabilities |
|----|---------------|---------------|---------------|---------------|---------------|---------------------|-------------------|-------------------|----------------------|--------------------|-----------------|--------------------|------------------------------------------------|
| 1  | <b>ORF297</b> | <b>11083</b>  | <b>11976</b>  | <b>894</b>    | <b>96.825</b> | <b>4</b>            | <b>66</b>         | <b>63</b>         | <b>1</b>             | <b>63</b>          | <b>6.07E-24</b> | <b><i>atp1</i></b> | <b>1 / 0.74887</b>                             |
| 2  | <b>ORF296</b> | <b>929844</b> | <b>930732</b> | <b>891</b>    | <b>96.875</b> | <b>4</b>            | <b>35</b>         | <b>32</b>         | <b>1</b>             | <b>32</b>          | <b>2.23E-08</b> | <b><i>atp1</i></b> | <b>3 / 0.99653</b>                             |
|    |               |               |               |               | <b>91.515</b> | <b>118</b>          | <b>282</b>        | <b>165</b>        | <b>1</b>             | <b>162</b>         | <b>1.65E-59</b> | <b><i>cox1</i></b> |                                                |
| 3  | <b>ORF194</b> | <b>462818</b> | <b>462234</b> | <b>585</b>    | <b>92.727</b> | <b>1</b>            | <b>162</b>        | <b>165</b>        | <b>1</b>             | <b>165</b>         | <b>7.61E-63</b> | <b><i>cox1</i></b> | <b>3 / 0.99422</b>                             |
| 4  | <b>ORF138</b> | <b>772394</b> | <b>771978</b> | <b>417</b>    | <b>96.324</b> | <b>1</b>            | <b>136</b>        | <b>136</b>        | <b>1</b>             | <b>136</b>         | <b>2.08E-59</b> | <b><i>nad6</i></b> | <b>4 / 0.83666</b>                             |
| 5  | ORF129        | 353926        | 354315        | 390           | 98.75         | 188                 | 110               | 80                | 203                  | 282                | 2.97E-35        | <i>rps19</i>       | 0 / 0.02742                                    |
| 6  | ORF126        | 771025        | 771405        | 381           | 98.438        | 278                 | 151               | 128               | 615                  | 740                | 1.40E-59        | <i>ccmFc</i>       | 0 / 0.07420                                    |
| 7  | ORF112        | 12267         | 11929         | 339           | 100           | 43                  | 1                 | 43                | 50                   | 92                 | 1.94E-16        | <i>nad6</i>        | 0 / 0.18937                                    |
|    |               |               |               |               | 98.925        | 249                 | 157               | 93                | 549                  | 641                | 2.81E-42        | <i>cox1</i>        |                                                |
| 9  | ORF102        | 543488        | 543180        | 309           | 95.161        | 248                 | 309               | 62                | 25                   | 86                 | 1.39E-22        | <i>atp9</i>        | 0 / 0.26823                                    |
| 10 | ORF98         | 431052        | 431348        | 297           | 90.6          | 71                  | 102               | 32                | 155                  | 186                | 4.26E-07        | <i>rrn26</i>       | 0 / 0.12362                                    |
| 11 | ORF90         | 324169        | 323897        | 273           | 100           | 1                   | 251               | 251               | 205                  | 455                | 8.91E-132       | <i>cox1</i>        | 0 / 0.23289                                    |
| 12 | ORF77         | 41289         | 41522         | 234           | 93.333        | 46                  | 17                | 30                | 3087                 | 3116               | 2.97E-05        | <i>rrn26</i>       | 0 / 0.10158                                    |
| 13 | ORF63         | 802201        | 802392        | 192           | 96.97         | 188                 | 156               | 33                | 510                  | 542                | 4.54E-09        | <i>atp6</i>        | 0 / 0.76896                                    |
| 14 | ORF59         | 1034878       | 135057        | 180           | 100           | 46                  | 162               | 117               | 1505                 | 1621               | 5.94E-57        | <i>rrn26</i>       | 0 / 0.27770                                    |
| 15 | ORF56         | 424903        | 424733        | 171           | 90.244        | 117                 | 37                | 82                | 23                   | 104                | 8.30E-25        | <i>atp9</i>        | 0 / 0.03328                                    |
| 16 | ORF53         | 695973        | 696134        | 162           | 97.297        | 39                  | 75                | 37                | 37                   | 1                  | 1.95E-11        | <i>nad6</i>        | 0 / 0.61660                                    |
|    | ORF52         | 1034984       | 1034826       | 159           | 100           | 62                  | 1                 | 62                | 1505                 | 1566               | 2.23E-26        | <i>rrn26</i>       | 0 / 0.12545                                    |
| 17 | <b>ORF51</b>  | <b>419736</b> | <b>419891</b> | <b>156</b>    | <b>97.778</b> | <b>133</b>          | <b>89</b>         | <b>45</b>         | <b>916</b>           | <b>960</b>         | <b>1.01E-15</b> | <b><i>rps4</i></b> | <b>1 / 0.23233</b>                             |
| 18 | ORF50         | 223906        | 224058        | 153           | 98.113        | 46                  | 98                | 53                | 945                  | 997                | 3.61E-20        | <i>rps4</i>        | 0 / 0.57962                                    |

**Supplementary Table S4.** General characteristics of newly sequenced plastomes.

| Taxon                                  | Plastome size (bp) | LSC length (bp) | SSC length (bp) | IR length (bp) | Protein-coding genes | tRNA genes | rRNA genes | GC content (%) | GenBank accession number |
|----------------------------------------|--------------------|-----------------|-----------------|----------------|----------------------|------------|------------|----------------|--------------------------|
| <b><i>Hepatica</i> Mill.</b>           |                    |                 |                 |                |                      |            |            |                |                          |
| <i>H. asiatica</i>                     | 160,157            | 80,343          | 17,778          | 31,018         | 76                   | 29         | 4          | 37.9           | MG952902                 |
| <i>H. henryi</i>                       | 159,892            | 80,779          | 17,029          | 31,042         | 76                   | 29         | 4          | 37.9           | MG952901                 |
| <i>H. insularis</i>                    | 160,423            | 80,538          | 17,831          | 31,027         | 76                   | 29         | 4          | 37.8           | MG952900                 |
| <i>H. maxima</i>                       | 160,876            | 80,998          | 17,684          | 31,097         | 76                   | 29         | 4          | 37.8           | MG952899                 |
| <i>H. nobilis</i> var. <i>japonica</i> | 160,988            | 80,996          | 17,792          | 31,100         | 76                   | 29         | 4          | 37.8           | MG952898                 |
| <b>Outgroup</b>                        |                    |                 |                 |                |                      |            |            |                |                          |
| <i>Anemone narcissiflora</i>           | 158,557            | 79,829          | 14,784          | 31,972         | 77                   | 29         | 4          | 37.7           | MG952903                 |
| <i>Pulsatilla koreana</i>              | 162,709            | 82,355          | 17,544          | 31,405         | 77                   | 29         | 4          | 37.4           | MG952897                 |

**Supplementary Table S5.** Organellar genes included in phylogenomic analyses.

| Gene Groups (abbreviation)                       | Genes                                                                                           |
|--------------------------------------------------|-------------------------------------------------------------------------------------------------|
| <b>Plastid</b>                                   |                                                                                                 |
| ATP synthase ( <i>atp</i> )                      | <i>atpA, atpB, atpE, atpF, atpH, atpI</i>                                                       |
| Cytochrome b6/f ( <i>pet</i> )                   | <i>petA, petB, petD, petG, petL, petN</i>                                                       |
| NADH-plastoquinone oxidoreductase ( <i>ndh</i> ) | <i>ndhA, ndhB, ndhC, ndhD, ndhE, ndhF, ndhG, ndhH, ndhI, ndhJ, ndhK</i>                         |
| Photosystem I ( <i>psa</i> )                     | <i>psaA, psaB, psaC, psaI, psaJ</i>                                                             |
| Photosystem II ( <i>psb</i> )                    | <i>psbA, psbB, psbC, psbD, psbE, psbF, psbH, psbI, psbJ, psbK, psbL, psbM, psbN, psbT, psbZ</i> |
| Ribosomal protein, large subunits ( <i>rpl</i> ) | <i>rpl2, rpl14, rpl16, rpl22, rpl33, rpl36</i>                                                  |
| Ribosomal protein, small subunits ( <i>rps</i> ) | <i>rps2, rps3, rps4, rps7, rps8, rps11, rps12, rps14, rps15, rps19</i>                          |
| RNA polymerase ( <i>rpo</i> )                    | <i>rpoA, rpoB, rpoC1, rpoC2</i>                                                                 |
| Others                                           | <i>ccsA, cemA, clpP, rbcL, ycf1, ycf2, ycf3, ycf4, matK</i>                                     |
| <b>Mitochondrion</b>                             |                                                                                                 |
| ATP synthase ( <i>atp</i> )                      | <i>atp1, atp4, atp6, apt8, atp9</i>                                                             |
| Cytochrome c Maturation ( <i>ccm</i> )           | <i>ccmB, ccmC, ccmFc, ccmFn</i>                                                                 |
| Cytochrome bc1 complex                           | <i>cob</i>                                                                                      |
| Cytochrome c oxidase ( <i>cox</i> )              | <i>cox1, cox2, cox3</i>                                                                         |
| NADH-ubiquinone oxidoreductase ( <i>nad</i> )    | <i>nad1, nad2, nad3, nad4, nad4L, nad5, nad6, nad7, nad9</i>                                    |
| Ribosomal proteins, large subunit                | <i>rpl2, rpl5, rpl10, rpl16</i>                                                                 |
| Ribosomal proteins, small subunit                | <i>rps2, rps3, rps4, rps7, rps11, rps12, rps13</i>                                              |
| Others                                           | <i>matR, mttB, sdh4</i>                                                                         |

**Supplementary Table S6. Transit peptide prediction scores of putative nuclear-encoded plastid and mitochondrial genes with GenBank accession numbers.** cTP = chloroplast transit peptide. mTP = a mitochondrial targeting peptide. RC indicates reliability class, from 1 to 5, where 1 indicates the strongest prediction. Tplen means predicted presequence length (cleavage sites). Bold font and Loc indicate prediction of localization (chloroplast or mitochondrion).

| Gene                                                | Taxa                                   | Len | cTP          | mTP          | SP    | other | Loc | RC | TPlen | GenBank  |
|-----------------------------------------------------|----------------------------------------|-----|--------------|--------------|-------|-------|-----|----|-------|----------|
| nuclear-<br>encoded<br><i>infA</i><br>for plastids  | <i>H. asiatica</i>                     | 149 | <b>0.940</b> | 0.065        | 0.012 | 0.058 | C   | 1  | 62    | MT560533 |
|                                                     | <i>H. henryi</i>                       | 148 | <b>0.905</b> | 0.044        | 0.027 | 0.080 | C   | 1  | 61    | MT560536 |
|                                                     | <i>H. insularis</i>                    | 149 | <b>0.940</b> | 0.065        | 0.012 | 0.058 | C   | 1  | 62    | MT560534 |
|                                                     | <i>H. maxima</i>                       | 149 | <b>0.929</b> | 0.072        | 0.013 | 0.049 | C   | 1  | 62    | MT560535 |
|                                                     | <i>H. nobilis</i> var. <i>japonica</i> | 149 | <b>0.930</b> | 0.070        | 0.013 | 0.050 | C   | 1  | 62    | MT560532 |
|                                                     | <i>Anemone narcissiflora</i>           | 148 | <b>0.905</b> | 0.041        | 0.029 | 0.106 | C   | 2  | 61    | MT560537 |
|                                                     | <i>Pulsatilla koreana</i>              | 138 | <b>0.840</b> | 0.158        | 0.035 | 0.070 | C   | 2  | 58    | MT560538 |
| nuclear-<br>encoded<br><i>rpl32</i><br>for plastids | <i>H. asiatica</i>                     | 177 | <b>0.845</b> | 0.375        | 0.004 | 0.016 | C   | 3  | 55    | MT560540 |
|                                                     | <i>H. henryi</i>                       | 177 | <b>0.895</b> | 0.189        | 0.008 | 0.038 | C   | 2  | 85    | MT560544 |
|                                                     | <i>H. insularis</i>                    | 179 | <b>0.858</b> | 0.286        | 0.005 | 0.021 | C   | 3  | 26    | MT560541 |
|                                                     | <i>H. maxima</i>                       | 177 | <b>0.862</b> | 0.315        | 0.004 | 0.023 | C   | 3  | 85    | MT560542 |
|                                                     | <i>H. nobilis</i> var. <i>japonica</i> | 177 | <b>0.862</b> | 0.315        | 0.004 | 0.023 | C   | 3  | 85    | MT560543 |
|                                                     | <i>Anemone narcissiflora</i>           | 163 | <b>0.692</b> | 0.548        | 0.008 | 0.023 | C   | 5  | 40    | MT560539 |
|                                                     | <i>Pulsatilla koreana</i>              | 154 | <b>0.915</b> | 0.238        | 0.004 | 0.021 | C   | 2  | 71    | MT560545 |
| nuclear-encoded<br><i>rps10</i><br>for mitochondria | <i>H. maxima</i>                       | 125 | 0.399        | <b>0.744</b> | 0.045 | 0.037 | M   | 4  | 12    | MT560546 |
| nuclear-encoded<br><i>rps14</i><br>for mitochondria | <i>H. maxima</i>                       | 155 | 0.170        | <b>0.740</b> | 0.041 | 0.041 | M   | 3  | 20    | MT560547 |

|                                                         |                                        |     |       |              |       |       |   |   |   |          |
|---------------------------------------------------------|----------------------------------------|-----|-------|--------------|-------|-------|---|---|---|----------|
| nuclear-<br>encoded<br><i>rps16</i><br>for plastids     | <i>H. asiatica</i>                     | 150 | 0.031 | <b>0.885</b> | 0.014 | 0.182 | M | 2 | 7 | MT560549 |
|                                                         | <i>H. henryi</i>                       | 150 | 0.025 | <b>0.895</b> | 0.013 | 0.187 | M | 2 | 7 | MT560548 |
|                                                         | <i>H. insularis</i>                    | 150 | 0.031 | <b>0.885</b> | 0.014 | 0.182 | M | 2 | 7 | MT560550 |
|                                                         | <i>H. maxima</i>                       | 150 | 0.031 | <b>0.885</b> | 0.014 | 0.182 | M | 2 | 7 | MT560551 |
|                                                         | <i>H. nobilis</i> var. <i>japonica</i> | 150 | 0.031 | <b>0.885</b> | 0.014 | 0.182 | M | 2 | 7 | MT560552 |
|                                                         | <i>Anemone narcissiflora</i>           | 154 | 0.020 | <b>0.881</b> | 0.014 | 0.220 | M | 2 | 7 | MT560553 |
|                                                         | <i>Pulsatilla koreana</i>              | 154 | 0.023 | <b>0.891</b> | 0.016 | 0.203 | M | 2 | 7 | MT560554 |
| nuclear-<br>encoded<br><i>rps16</i><br>for mitochondria | <i>H. asiatica</i>                     | 163 | 0.016 | <b>0.871</b> | 0.009 | 0.225 | M | 2 | 7 | MT560556 |
|                                                         | <i>H. henryi</i>                       | 135 | 0.015 | <b>0.888</b> | 0.010 | 0.221 | M | 2 | 7 | MT560557 |
|                                                         | <i>H. insularis</i>                    | 149 | 0.017 | <b>0.872</b> | 0.009 | 0.224 | M | 2 | 7 | MT560559 |
|                                                         | <i>H. maxima</i>                       | 150 | 0.015 | <b>0.888</b> | 0.010 | 0.221 | M | 2 | 7 | MT560558 |
|                                                         | <i>H. nobilis</i> var. <i>japonica</i> | 118 | 0.022 | <b>0.870</b> | 0.015 | 0.165 | M | 2 | 7 | MT560560 |
|                                                         | <i>Anemone narcissiflora</i>           | 136 | 0.017 | <b>0.875</b> | 0.010 | 0.212 | M | 2 | 7 | MT560555 |
|                                                         | <i>Pulsatilla koreana</i>              | 135 | 0.019 | <b>0.897</b> | 0.010 | 0.163 | M | 2 | 7 | MT560561 |

**Supplementary Table S7.** General characteristics of nuclear orthologs.

|                                                   | <i>A.<br/>narcissiflora</i> | <i>H. asiatica</i> | <i>H. henryi</i> | <i>H. insularis</i> | <i>H. maxima</i> | <i>H. nobilis<br/>var. japonica</i> | <i>P. koreana</i> |
|---------------------------------------------------|-----------------------------|--------------------|------------------|---------------------|------------------|-------------------------------------|-------------------|
| Numer of unigenes by Trinity                      | 151,868                     | 106,836            | 181,489          | 109,522             | 112,733          | 123,856                             | 91,319            |
| TransRate score                                   | 0.1114                      | 0.1374             | 0.087            | 0.1094              | 0.0281           | 0.1248                              | 0.0889            |
| Filtered good transcripts by TransRate            | 92,812                      | 74,200             | 119,300          | 76,764              | 33,865           | 89,778                              | 59,163            |
| Number of complete ORFs                           | 9,404                       | 10,020             | 10,852           | 10,168              | 8,914            | 11,704                              | 8,232             |
| Number of genes in orthogroups                    | 8,327                       | 9,423              | 9,461            | 9,512               | 8,258            | 10,918                              | 7,651             |
| Number of orthogroups                             |                             |                    |                  | 11,456              |                  |                                     |                   |
| Number of orthogroups with all<br>species present |                             |                    |                  | 1,428               |                  |                                     |                   |
| Number of single-copy orthogroups                 |                             |                    |                  | 510                 |                  |                                     |                   |

**Supplementary Table S8.** Scores of each criterion calculated by TreSpEx. Bold values indicate high degrees of misleading signals. Standard deviation and the average of upper quartile of long-branch scores, and the saturation degree was determined by slopes and R2 values of linear regressions of patristic distances against uncorrected distances  $p$ , with alignments of the 510 gene sequences.

| Gene      | Slope              | R2                 | LB_score_upper_<br>quartile | LB_score_<br>Heterogeneity |
|-----------|--------------------|--------------------|-----------------------------|----------------------------|
| OG0002494 | <b>0.545768471</b> | 0.98826928         | 15.7415164                  | 14.59278659                |
| OG0002036 | 0.820745464        | 0.997598744        | 20.66624549                 | 17.75957658                |
| OG0001963 | 0.671741599        | 0.96453961         | 32.16379982                 | 23.8689893                 |
| OG0002718 | <b>0.397374767</b> | <b>0.833014206</b> | 32.9053919                  | 27.98301341                |
| OG0002711 | 0.589113358        | <b>0.867415612</b> | 36.39636745                 | 33.10752059                |
| OG0001931 | 0.691438822        | 0.988119374        | 48.56182057                 | 34.90100371                |
| OG0002260 | 0.754920914        | 0.991657836        | 50.92923091                 | 35.95188417                |
| OG0002000 | 0.818446973        | 0.994057758        | 53.70085616                 | 36.86363922                |
| OG0002510 | 0.765254458        | 0.98500621         | 49.81475954                 | 37.03254655                |
| OG0002631 | 0.727256407        | 0.988951573        | 49.93383298                 | 37.46419116                |
| OG0002564 | <b>0.422920578</b> | <b>0.699239755</b> | 41.29707122                 | 37.84679462                |
| OG0001933 | 0.842509471        | <b>0.954329906</b> | 51.22008315                 | 37.86892097                |
| OG0002605 | 0.631541082        | <b>0.752212619</b> | 48.42732332                 | 38.04247379                |
| OG0002560 | 0.702074349        | <b>0.957845551</b> | 47.74545886                 | 38.74675972                |
| OG0001838 | 0.882754524        | 0.995596721        | 55.04756092                 | 39.52863227                |
| OG0001947 | 0.646111524        | <b>0.896038324</b> | 49.0992213                  | 41.01723792                |
| OG0001986 | 0.811025991        | <b>0.936140837</b> | 52.41995889                 | 41.64915763                |
| OG0001960 | <b>0.260823163</b> | <b>0.633953201</b> | 48.22420843                 | 42.46683224                |
| OG0001984 | 0.833138507        | 0.994272516        | 61.99459112                 | 43.44555263                |



|           |                    |                    |             |             |
|-----------|--------------------|--------------------|-------------|-------------|
| OG0002302 | 0.705869784        | 0.978611622        | 61.22206736 | 44.4290584  |
| OG0002543 | <b>0.076584618</b> | <b>0.497789024</b> | 65.03081544 | 44.50310725 |
| OG0002719 | 0.69286654         | <b>0.900461003</b> | 52.61019885 | 44.93388709 |
| OG0002465 | 0.874886899        | 0.998074966        | 62.50602716 | 44.95670793 |
| OG0002187 | 0.743138739        | 0.995095345        | 64.47029513 | 45.28578079 |
| OG0001880 | <b>0.551845767</b> | <b>0.728412658</b> | 50.42903671 | 45.29001316 |
| OG0002052 | 0.903709011        | 0.998323707        | 65.92597846 | 45.4246741  |
| OG0002402 | 0.747044665        | 0.992210815        | 63.21218862 | 45.60131959 |
| OG0001834 | 0.789089739        | 0.997297163        | 66.26348478 | 45.60879292 |
| OG0002626 | 0.810393814        | <b>0.9424684</b>   | 62.66524594 | 45.64378728 |
| OG0002700 | 0.644923496        | <b>0.923332294</b> | 52.22799047 | 45.83507343 |
| OG0002378 | <b>0.511249973</b> | <b>0.919382165</b> | 67.18337267 | 45.92472502 |
| OG0002628 | 0.796829829        | 0.997542784        | 65.43394083 | 46.16354194 |
| OG0002380 | 0.886207572        | 0.998329688        | 64.59531038 | 46.28471801 |
| OG0002562 | 0.670145556        | <b>0.835495913</b> | 62.44628628 | 46.40723413 |
| OG0002447 | 0.703244178        | 0.98620912         | 66.25877304 | 46.45854824 |
| OG0002575 | 0.756266991        | 0.989190362        | 67.95319992 | 46.82511657 |
| OG0001907 | 0.879916086        | 0.99535076         | 69.24857237 | 47.49274437 |
| OG0002645 | 0.663296801        | <b>0.949506192</b> | 60.65054789 | 47.57602505 |
| OG0002388 | 0.772546676        | 0.970758415        | 68.32799133 | 48.00210009 |
| OG0002445 | 0.726962582        | 0.974841209        | 69.37231876 | 48.09232372 |
| OG0002701 | 0.924626225        | 0.999661985        | 68.3713958  | 48.14489103 |
| OG0002027 | <b>0.427717155</b> | 0.990356182        | 70.13460496 | 48.30676703 |
| OG0002587 | 0.794680268        | 0.997970429        | 71.09045779 | 48.65056871 |
| OG0002049 | <b>0.473513054</b> | <b>0.671224932</b> | 65.06701333 | 48.6779521  |
| OG0002223 | 0.879428362        | 0.995107957        | 69.54705493 | 48.68706367 |

|           |                    |                    |             |             |
|-----------|--------------------|--------------------|-------------|-------------|
| OG0001964 | 0.774784275        | 0.996916204        | 71.18926138 | 48.81922686 |
| OG0002086 | 0.877830804        | 0.98759904         | 70.07665752 | 49.1645656  |
| OG0002591 | 0.808291445        | 0.990220158        | 70.93269853 | 49.21395441 |
| OG0001943 | 0.724682205        | 0.989413534        | 71.46323777 | 49.24204002 |
| OG0002430 | 0.658035554        | 0.994476508        | 71.88435377 | 49.51483228 |
| OG0002593 | 0.783985474        | 0.996545819        | 71.48282116 | 49.55528847 |
| OG0001831 | 0.79366358         | 0.996931655        | 71.42173005 | 49.59029745 |
| OG0002606 | 0.783731188        | 0.994550746        | 70.35340452 | 49.60858307 |
| OG0002148 | <b>0.042073663</b> | <b>0.947983843</b> | 72.74101602 | 49.70255259 |
| OG0002394 | <b>0.10708108</b>  | <b>0.706593548</b> | 73.15647145 | 50.07460723 |
| OG0002136 | 0.851343493        | 0.997333141        | 71.35891325 | 50.08290613 |
| OG0002288 | <b>0.36752201</b>  | <b>0.701446061</b> | 67.45632956 | 50.15307449 |
| OG0002171 | 0.687041296        | <b>0.778684309</b> | 72.8391521  | 50.23828539 |
| OG0002295 | 0.650574489        | 0.979424346        | 73.37557437 | 50.30497868 |
| OG0002503 | 0.892450714        | 0.998704654        | 70.33383913 | 50.32969331 |
| OG0002600 | 0.827052497        | 0.998515307        | 73.26005111 | 50.33174105 |
| OG0002454 | 0.66110199         | 0.985281651        | 71.52337598 | 50.5762262  |
| OG0002315 | 0.733286164        | 0.975224137        | 73.71387994 | 50.6053376  |
| OG0002045 | 0.779978221        | 0.996996683        | 73.39743236 | 50.66600404 |
| OG0001969 | 0.928519679        | 0.999746482        | 73.29834124 | 50.77086783 |
| OG0002589 | 0.918784875        | 0.998633473        | 73.02245397 | 50.77670201 |
| OG0002521 | 0.775826966        | 0.996657798        | 74.51545833 | 50.98645598 |
| OG0002670 | 0.808483297        | 0.996611811        | 73.09662912 | 51.02193002 |
| OG0002616 | 0.908229831        | 0.996610831        | 72.87884659 | 51.03196554 |
| OG0002576 | 0.740822459        | <b>0.90210173</b>  | 73.43428323 | 51.0387014  |
| OG0002630 | 0.844536552        | 0.998391018        | 72.16272591 | 51.0710339  |

|           |             |                    |             |             |
|-----------|-------------|--------------------|-------------|-------------|
| OG0002705 | 0.738566032 | 0.995809556        | 73.27544282 | 51.12939893 |
| OG0001828 | 0.741626572 | 0.997373084        | 74.7964128  | 51.27268977 |
| OG0002145 | 0.730137302 | 0.995650935        | 73.94616588 | 51.35878202 |
| OG0002343 | 0.78034726  | 0.994830441        | 74.74889754 | 51.55028433 |
| OG0002710 | 0.810089359 | 0.99560444         | 73.66735624 | 51.61175787 |
| OG0001957 | 0.877982154 | 0.998462667        | 72.65550487 | 51.62246079 |
| OG0002029 | 0.894992408 | 0.999239776        | 73.45897281 | 51.66476135 |
| OG0001847 | 0.766957517 | 0.996221996        | 75.11914514 | 51.82562567 |
| OG0002624 | 0.918736494 | 0.999326719        | 73.75600168 | 51.82665175 |
| OG0002400 | 0.892680672 | 0.999165438        | 74.52487651 | 51.84036675 |
| OG0002681 | 0.908633553 | 0.998736499        | 75.8222795  | 51.88027083 |
| OG0002595 | 0.810667444 | <b>0.959471179</b> | 75.16355319 | 51.90170659 |
| OG0002275 | 0.882561883 | 0.999449465        | 74.46430908 | 51.98430861 |
| OG0002274 | 0.796135094 | 0.998919815        | 75.71480534 | 52.09556753 |
| OG0002309 | 0.856967433 | 0.998730332        | 76.14737737 | 52.17697077 |
| OG0002601 | 0.814256334 | <b>0.9356072</b>   | 74.25284185 | 52.17814147 |
| OG0002131 | 0.616081015 | <b>0.716712626</b> | 75.79785503 | 52.21333211 |
| OG0002635 | 0.876054861 | 0.999346985        | 73.48903342 | 52.26841688 |
| OG0002150 | 0.707976076 | 0.992464006        | 74.08191202 | 52.28775664 |
| OG0002189 | 0.727779026 | 0.997831473        | 75.90471547 | 52.2914593  |
| OG0002384 | 0.921616276 | 0.99985413         | 76.2300887  | 52.30877147 |
| OG0001946 | 0.642116896 | <b>0.867369597</b> | 76.43801261 | 52.43177239 |
| OG0002632 | 0.769544077 | 0.998327965        | 75.87825593 | 52.43984488 |
| OG0002396 | 0.905750171 | 0.99929456         | 75.94735641 | 52.47136062 |
| OG0002128 | 0.872521073 | 0.999104166        | 76.59558469 | 52.5362885  |
| OG0002137 | 0.902098216 | 0.999021031        | 74.97197379 | 52.55977899 |

|           |             |                    |             |             |
|-----------|-------------|--------------------|-------------|-------------|
| OG0002186 | 0.874323536 | 0.997961098        | 76.75074866 | 52.57304028 |
| OG0002448 | 0.825965749 | 0.998793482        | 76.25685702 | 52.59533219 |
| OG0001835 | 0.802952363 | 0.991123909        | 72.85273957 | 52.63948521 |
| OG0002111 | 0.799848817 | 0.998922389        | 74.50649632 | 52.72923411 |
| OG0002642 | 0.870703938 | 0.99961559         | 76.76702248 | 52.83469646 |
| OG0001917 | 0.951717999 | 0.999361799        | 77.09801087 | 52.94366328 |
| OG0002340 | 0.792079264 | 0.994631509        | 73.75847846 | 53.01497353 |
| OG0002184 | 0.878402861 | 0.998365691        | 77.47546038 | 53.11229664 |
| OG0002499 | 0.884602165 | 0.999149211        | 77.33562244 | 53.20000573 |
| OG0002081 | 0.808974142 | 0.998845896        | 76.82171048 | 53.24437157 |
| OG0002181 | 0.82436577  | 0.998192367        | 78.03924979 | 53.50530247 |
| OG0002078 | 0.852733854 | 0.998501501        | 76.91513551 | 53.50800106 |
| OG0002296 | 0.843662097 | 0.998466051        | 78.28174362 | 53.52206965 |
| OG0002346 | 0.827661782 | 0.994028842        | 75.27249676 | 53.63637023 |
| OG0002354 | 0.932804923 | 0.999530554        | 77.43323094 | 53.6514233  |
| OG0002013 | 0.776584825 | 0.999061074        | 78.39588109 | 53.66618801 |
| OG0002090 | 0.827370736 | 0.998419023        | 77.57653832 | 53.67096612 |
| OG0002122 | 0.801102048 | 0.998130757        | 77.71685339 | 53.67430857 |
| OG0001905 | 0.787635613 | 0.996323306        | 76.55571619 | 53.74804554 |
| OG0001849 | 0.633972764 | <b>0.953588024</b> | 77.87579003 | 53.77356481 |
| OG0002014 | 0.896702732 | 0.998346708        | 77.77341098 | 53.82343751 |
| OG0002639 | 0.68238743  | 0.987828447        | 76.44001248 | 53.86454473 |
| OG0002066 | 0.810778414 | 0.999190444        | 78.46370553 | 53.87699135 |
| OG0002266 | 0.759459466 | 0.996114242        | 78.59533823 | 53.90504412 |
| OG0002650 | 0.802096682 | 0.99457902         | 78.29355827 | 53.94294272 |
| OG0002089 | 0.800521382 | <b>0.940088617</b> | 77.78435056 | 53.9697023  |

|           |                    |                    |             |             |
|-----------|--------------------|--------------------|-------------|-------------|
| OG0001993 | 0.704231683        | 0.989120564        | 70.50423453 | 53.9822513  |
| OG0002508 | <b>0.451543495</b> | <b>0.704333066</b> | 78.79719161 | 54.00951659 |
| OG0002696 | 0.71441319         | 0.996667742        | 78.09968018 | 54.01769628 |
| OG0002578 | 0.778136956        | 0.996530723        | 78.85884231 | 54.03709278 |
| OG0002571 | 0.911366921        | 0.999697277        | 78.73918546 | 54.05647969 |
| OG0002625 | 0.76477028         | 0.968089508        | 78.71661108 | 54.06658317 |
| OG0002016 | 0.759191359        | 0.99822208         | 79.06418045 | 54.152717   |
| OG0002167 | 0.895236288        | 0.999092369        | 79.02283658 | 54.19681378 |
| OG0002405 | 0.714227025        | 0.974754559        | 76.42509737 | 54.24033126 |
| OG0002087 | 0.86225608         | 0.999069231        | 78.46283312 | 54.2761955  |
| OG0002314 | 0.580441981        | 0.981214659        | 79.46275511 | 54.30256517 |
| OG0002376 | 0.888758469        | 0.999557926        | 78.82985707 | 54.30867432 |
| OG0001886 | 0.804779031        | 0.998507783        | 79.09403847 | 54.31886953 |
| OG0002210 | 0.781601406        | 0.997501571        | 79.01532127 | 54.3297544  |
| OG0002099 | 0.837608085        | 0.998731851        | 78.65850464 | 54.37555478 |
| OG0002477 | 0.633578761        | 0.968035658        | 79.41020522 | 54.45940157 |
| OG0002683 | 0.904405112        | 0.998822346        | 77.92587611 | 54.46391423 |
| OG0001889 | 0.711856698        | 0.998050991        | 78.70957214 | 54.47593512 |
| OG0002190 | 0.758338211        | 0.971852329        | 77.20989699 | 54.48457461 |
| OG0001895 | 0.715337547        | <b>0.853941063</b> | 79.52926886 | 54.48963882 |
| OG0002028 | 0.705397287        | 0.997199331        | 79.66682508 | 54.5430956  |
| OG0002263 | <b>0.302484644</b> | <b>0.573110667</b> | 71.91493747 | 54.62706765 |
| OG0002092 | 0.744437567        | 0.997616705        | 78.38411643 | 54.67322329 |
| OG0002125 | 0.85530654         | 0.999356307        | 79.85621412 | 54.69562866 |
| OG0002581 | 0.744206242        | 0.995252616        | 79.40481971 | 54.71501848 |
| OG0001961 | 0.77060725         | 0.998083099        | 79.68047199 | 54.75265219 |

|           |             |                    |             |             |
|-----------|-------------|--------------------|-------------|-------------|
| OG0002365 | 0.677900793 | 0.996283007        | 79.44129423 | 54.76910872 |
| OG0002072 | 0.81883243  | 0.99555166         | 79.13262733 | 54.81815114 |
| OG0002428 | 0.834546149 | 0.998045407        | 80.02565896 | 54.82106624 |
| OG0002048 | 0.645992634 | 0.986438296        | 76.54088318 | 54.82167231 |
| OG0002577 | 0.901476912 | 0.999856663        | 79.89588714 | 54.84627071 |
| OG0001884 | 0.924942823 | 0.999124606        | 79.21593702 | 54.89801139 |
| OG0002476 | 0.837054619 | 0.998641183        | 79.82171028 | 54.99755092 |
| OG0002524 | 0.586166072 | <b>0.934317132</b> | 71.15197637 | 55.00438618 |
| OG0002520 | 0.800855221 | <b>0.894168041</b> | 80.24689046 | 55.00999287 |
| OG0001888 | 0.792692847 | 0.995526881        | 80.29596838 | 55.04672916 |
| OG0002056 | 0.63424918  | 0.975012634        | 78.39349413 | 55.05267227 |
| OG0002284 | 0.925113966 | 0.998790624        | 79.81168616 | 55.05562181 |
| OG0002075 | 0.852179098 | 0.989329523        | 79.61314182 | 55.07020149 |
| OG0002397 | 0.899164839 | 0.999059922        | 79.37460491 | 55.1155518  |
| OG0002093 | 0.866390624 | 0.999748532        | 80.33631044 | 55.14772154 |
| OG0002654 | 0.838885804 | 0.998853014        | 80.40921264 | 55.18264316 |
| OG0002436 | 0.912093196 | 0.999045224        | 80.51979387 | 55.20637629 |
| OG0002694 | 0.943307854 | 0.999787471        | 80.04519517 | 55.229051   |
| OG0002331 | 0.852262288 | 0.99730053         | 79.35300778 | 55.23343559 |
| OG0002351 | 0.839135539 | 0.999252513        | 80.20353017 | 55.24479238 |
| OG0002425 | 0.738029849 | <b>0.955026354</b> | 80.68163586 | 55.27902819 |
| OG0002168 | 0.769288921 | 0.997939112        | 80.09397032 | 55.29064819 |
| OG0001967 | 0.759010519 | 0.996982253        | 79.37770635 | 55.29714487 |
| OG0002480 | 0.886696574 | 0.999439758        | 80.49928439 | 55.38049774 |
| OG0002297 | 0.777677483 | 0.99582381         | 80.37832841 | 55.40654461 |
| OG0002366 | 0.775830767 | 0.997492724        | 79.97110569 | 55.4136279  |

|           |                    |                   |             |             |
|-----------|--------------------|-------------------|-------------|-------------|
| OG0002697 | 0.772455898        | 0.999199564       | 80.74103613 | 55.42515454 |
| OG0002196 | 0.773948955        | 0.998003248       | 80.82187951 | 55.42916542 |
| OG0002272 | 0.71998211         | 0.996963277       | 80.78479647 | 55.43733978 |
| OG0001971 | 0.735442481        | 0.965562157       | 80.65917268 | 55.44419739 |
| OG0001909 | 0.757786223        | 0.998965364       | 79.47530784 | 55.46429133 |
| OG0002594 | 0.925325588        | 0.99915364        | 79.88607583 | 55.46674983 |
| OG0001837 | 0.844386957        | 0.996296726       | 80.84050221 | 55.47086059 |
| OG0002258 | 0.777995814        | 0.998188403       | 80.24095811 | 55.52745482 |
| OG0002094 | 0.763602001        | 0.998660561       | 81.17884493 | 55.5389107  |
| OG0002656 | 0.924930745        | 0.999071868       | 80.51803858 | 55.60347618 |
| OG0002144 | 0.867375729        | 0.997719001       | 81.1801303  | 55.6270901  |
| OG0001918 | 0.748442248        | 0.999060713       | 80.7104339  | 55.63890684 |
| OG0002061 | <b>0.538582063</b> | <b>0.66257577</b> | 81.33814756 | 55.65422671 |
| OG0002134 | 0.809094132        | 0.980626095       | 81.33957405 | 55.66420833 |
| OG0002505 | 0.906326567        | 0.99763975        | 81.05178674 | 55.66450113 |
| OG0002511 | 0.878253476        | 0.99886037        | 81.24067253 | 55.69850214 |
| OG0002130 | 0.831481481        | 0.998341844       | 80.40493403 | 55.71728755 |
| OG0002313 | 0.833476132        | 0.998967334       | 81.49566857 | 55.72570969 |
| OG0002493 | 0.80138335         | 0.996530299       | 81.15580157 | 55.74756552 |
| OG0002126 | 0.609460595        | 0.981255896       | 81.23968476 | 55.78979084 |
| OG0002434 | 0.76514428         | 0.998972018       | 81.16113291 | 55.80112407 |
| OG0002671 | 0.832003944        | 0.995620902       | 79.61642782 | 55.80115771 |
| OG0002404 | 0.906160992        | 0.999027215       | 81.65112056 | 55.83001261 |
| OG0002002 | 0.855616482        | 0.996795804       | 78.46752594 | 55.83618276 |
| OG0002201 | 0.931191378        | 0.999479236       | 81.71551028 | 55.83886024 |
| OG0001856 | 0.835884543        | 0.998695707       | 79.90659775 | 55.87097941 |

|           |             |                    |             |             |
|-----------|-------------|--------------------|-------------|-------------|
| OG0002500 | 0.688944953 | 0.993033476        | 81.50301582 | 55.90874562 |
| OG0002381 | 0.711447071 | 0.996107107        | 80.82916668 | 55.98190326 |
| OG0002475 | 0.711517143 | 0.99125807         | 81.23096496 | 56.01222182 |
| OG0002247 | 0.809408247 | 0.998956408        | 81.96944345 | 56.02484803 |
| OG0001987 | 0.908702928 | 0.999615803        | 81.87343694 | 56.03584009 |
| OG0002653 | 0.818964072 | 0.99870205         | 81.87424134 | 56.0412683  |
| OG0002088 | 0.739128787 | <b>0.956267371</b> | 78.23919019 | 56.05887764 |
| OG0002177 | 0.912191393 | 0.999403201        | 81.89174995 | 56.06288191 |
| OG0002255 | 0.692795643 | 0.990935259        | 80.96178952 | 56.1018982  |
| OG0001923 | 0.857922489 | 0.998484968        | 81.36868017 | 56.13919303 |
| OG0002460 | 0.79848341  | 0.98961769         | 81.79840872 | 56.14196982 |
| OG0002254 | 0.819498636 | 0.998756588        | 81.44084476 | 56.16416565 |
| OG0002479 | 0.827643969 | 0.999332252        | 81.15474541 | 56.16675589 |
| OG0002422 | 0.78064435  | 0.996773605        | 81.12947231 | 56.17276418 |
| OG0002335 | 0.783300729 | 0.984195745        | 81.4354387  | 56.17862307 |
| OG0002393 | 0.808645654 | 0.996979674        | 81.01415094 | 56.18367506 |
| OG0002127 | 0.89721876  | 0.998220205        | 77.55219652 | 56.19173326 |
| OG0002300 | 0.857857817 | 0.999463574        | 81.78580925 | 56.23768425 |
| OG0001830 | 0.740398313 | 0.991462865        | 78.66381336 | 56.26542723 |
| OG0002620 | 0.824406048 | 0.998477261        | 82.08355828 | 56.28010262 |
| OG0002285 | 0.897216803 | 0.997832111        | 81.05068761 | 56.29127313 |
| OG0002246 | 0.597027325 | 0.994464925        | 82.39623749 | 56.32682745 |
| OG0002133 | 0.726377847 | 0.996626725        | 82.06269418 | 56.35416773 |
| OG0002147 | 0.844036436 | 0.998541224        | 81.75297651 | 56.37433646 |
| OG0001891 | 0.801318284 | 0.999363276        | 82.10631172 | 56.42514192 |
| OG0002466 | 0.717344606 | 0.9977236          | 82.3254048  | 56.43002423 |



|           |                    |                    |             |             |
|-----------|--------------------|--------------------|-------------|-------------|
| OG0002234 | <b>0.459513811</b> | <b>0.513911436</b> | 82.03480053 | 56.44929704 |
| OG0001914 | 0.676806876        | 0.993408542        | 82.40923115 | 56.45079114 |
| OG0002588 | 0.762249124        | 0.971620222        | 82.1745424  | 56.45140007 |
| OG0002648 | 0.841359825        | 0.995324338        | 82.28731236 | 56.46042403 |
| OG0002484 | 0.800404909        | 0.997840914        | 82.3632442  | 56.46155337 |
| OG0002586 | 0.819074529        | 0.998233701        | 82.14939111 | 56.55927449 |
| OG0002514 | 0.623479983        | <b>0.960869524</b> | 82.5693486  | 56.6089849  |
| OG0002264 | 0.854128504        | 0.997889054        | 82.63175074 | 56.61274691 |
| OG0002668 | 0.737636174        | <b>0.911103554</b> | 81.37280329 | 56.6438604  |
| OG0002046 | 0.883655505        | 0.999205327        | 81.95570637 | 56.65011786 |
| OG0002022 | 0.811204244        | 0.99385696         | 81.1734554  | 56.70265937 |
| OG0002228 | 0.915673695        | 0.999625836        | 82.83418546 | 56.73335523 |
| OG0001877 | 0.771933357        | 0.998298052        | 81.90975368 | 56.77226855 |
| OG0002252 | 0.812619972        | 0.998455695        | 82.63322649 | 56.78797929 |
| OG0002237 | 0.78308151         | 0.99907042         | 82.59708653 | 56.83546803 |
| OG0002079 | 0.83066893         | 0.989187572        | 83.2104418  | 56.85331895 |
| OG0002429 | <b>0.263060518</b> | <b>0.704857893</b> | 71.75438557 | 56.89226346 |
| OG0002159 | 0.777425749        | 0.995584307        | 82.98549632 | 56.92610441 |
| OG0002598 | 0.704111295        | 0.997422899        | 82.2913677  | 56.93019429 |
| OG0002032 | 0.913020715        | 0.99968385         | 82.67581054 | 56.97371925 |
| OG0002708 | 0.877595531        | 0.998934674        | 83.08205583 | 57.06870625 |
| OG0002371 | 0.857275295        | 0.998180104        | 81.6711403  | 57.089243   |
| OG0002411 | 0.799644098        | 0.999553483        | 83.51425999 | 57.13305757 |
| OG0002018 | 0.850216889        | 0.988247869        | 83.40701232 | 57.13547907 |
| OG0002693 | 0.698669592        | <b>0.95776148</b>  | 82.20623648 | 57.14883261 |
| OG0002160 | 0.80825228         | 0.999107349        | 83.29329638 | 57.1526704  |

|           |             |             |             |             |
|-----------|-------------|-------------|-------------|-------------|
| OG0002085 | 0.797695573 | 0.992557893 | 81.22636032 | 57.18771748 |
| OG0002679 | 0.783673834 | 0.996038174 | 80.07823975 | 57.19167471 |
| OG0002180 | 0.734298012 | 0.99542033  | 83.42197629 | 57.2105664  |
| OG0002399 | 0.712588732 | 0.996407757 | 83.62392717 | 57.22513874 |
| OG0002129 | 0.884935    | 0.999227487 | 83.43339259 | 57.24641064 |
| OG0002157 | 0.702592493 | 0.968840197 | 81.43682336 | 57.26636344 |
| OG0002407 | 0.809413984 | 0.998375321 | 82.7987155  | 57.30537095 |
| OG0002435 | 0.784907417 | 0.997405521 | 81.73619278 | 57.342257   |
| OG0002039 | 0.769169532 | 0.997545573 | 83.67352383 | 57.34280397 |
| OG0002659 | 0.688797248 | 0.997551577 | 83.31087626 | 57.34627136 |
| OG0001878 | 0.709399576 | 0.990788217 | 83.02623694 | 57.35303025 |
| OG0001871 | 0.73633184  | 0.992806873 | 83.80075911 | 57.38200459 |
| OG0002293 | 0.864950807 | 0.998492928 | 80.78235253 | 57.5079834  |
| OG0002338 | 0.790966208 | 0.997597769 | 83.80106357 | 57.51939919 |
| OG0001999 | 0.765693264 | 0.997337595 | 84.03021343 | 57.52664307 |
| OG0002461 | 0.738125457 | 0.991826838 | 83.23353479 | 57.52756694 |
| OG0002687 | 0.884673706 | 0.998887737 | 83.86265445 | 57.52871619 |
| OG0002262 | 0.667093745 | 0.997891869 | 83.73186061 | 57.56383316 |
| OG0001992 | 0.705967917 | 0.990962244 | 81.47716702 | 57.56802613 |
| OG0001942 | 0.757898197 | 0.993433204 | 82.46747078 | 57.57767262 |
| OG0002101 | 0.759975823 | 0.998380202 | 83.19157485 | 57.64604246 |
| OG0002208 | 0.824053373 | 0.999234272 | 83.91630347 | 57.65417034 |
| OG0002269 | 0.865203248 | 0.994523709 | 84.12371568 | 57.65836205 |
| OG0002426 | 0.812241344 | 0.999120601 | 83.80915735 | 57.68756709 |
| OG0002118 | 0.848306797 | 0.999297021 | 84.09430378 | 57.69650748 |
| OG0002622 | 0.743164768 | 0.996368441 | 82.98394785 | 57.709068   |

|           |                   |                    |             |             |
|-----------|-------------------|--------------------|-------------|-------------|
| OG0002355 | 0.647444114       | <b>0.817368649</b> | 84.01212871 | 57.72512463 |
| OG0002379 | 0.838278343       | 0.999390971        | 83.60182599 | 57.73211993 |
| OG0002279 | 0.837782412       | 0.99951407         | 83.78571585 | 57.74134024 |
| OG0002248 | 0.74092378        | 0.99791044         | 83.40000285 | 57.77911252 |
| OG0002103 | 0.889530014       | 0.99888725         | 84.38512848 | 57.79754009 |
| OG0002421 | 0.774961676       | 0.994660102        | 84.6858204  | 57.90274812 |
| OG0002542 | 0.758090631       | 0.996613349        | 84.53961826 | 57.91207332 |
| OG0002690 | 0.887649786       | 0.998910913        | 82.88081736 | 57.91809325 |
| OG0002170 | 0.841344812       | 0.999174064        | 84.41862313 | 57.94001122 |
| OG0001962 | 0.837070683       | 0.998478715        | 82.9549027  | 57.96501081 |
| OG0002412 | 0.899323469       | 0.998427407        | 84.56747624 | 57.96815779 |
| OG0002619 | 0.876008583       | 0.999592262        | 84.44845296 | 57.97505632 |
| OG0002304 | 0.775129599       | 0.994701282        | 83.19509952 | 58.03657857 |
| OG0002173 | 0.73520377        | 0.994615584        | 84.68623007 | 58.06968157 |
| OG0002283 | <b>0.53617578</b> | <b>0.904704863</b> | 83.41374484 | 58.12551179 |
| OG0002050 | 0.72501307        | <b>0.928694584</b> | 84.30718652 | 58.13109408 |
| OG0002330 | 0.916354391       | 0.999864121        | 84.79592381 | 58.13730293 |
| OG0002215 | 0.725958805       | 0.991084738        | 85.17754194 | 58.21641269 |
| OG0001869 | 0.795800591       | 0.997888429        | 84.99253847 | 58.23275646 |
| OG0001919 | 0.883264692       | 0.999445683        | 81.75499919 | 58.25474425 |
| OG0002033 | 0.871558455       | 0.99916441         | 80.45847026 | 58.25994535 |
| OG0002415 | 0.668721861       | 0.99511328         | 85.03191273 | 58.27050665 |
| OG0002373 | 0.875358874       | 0.996037538        | 83.90410246 | 58.34743476 |
| OG0002240 | 0.800941977       | 0.99751752         | 84.08898055 | 58.3502476  |
| OG0001893 | 0.797898855       | 0.998038251        | 84.9813754  | 58.35308445 |
| OG0002389 | 0.862031463       | 0.998776702        | 81.30728942 | 58.43344813 |

|           |                    |                    |             |             |
|-----------|--------------------|--------------------|-------------|-------------|
| OG0002392 | 0.650171183        | 0.990696508        | 85.262764   | 58.44788458 |
| OG0002253 | 0.71149461         | 0.998011462        | 85.09447984 | 58.46304567 |
| OG0002627 | 0.585902476        | <b>0.875768977</b> | 84.93611535 | 58.4712011  |
| OG0002291 | 0.730965095        | 0.995894548        | 84.40317535 | 58.49405474 |
| OG0002451 | 0.799962933        | 0.999039912        | 85.62850122 | 58.55517922 |
| OG0002282 | 0.702445468        | 0.998294415        | 84.87456877 | 58.55846752 |
| OG0002666 | 0.716485822        | 0.998095761        | 83.86213077 | 58.57105983 |
| OG0002582 | 0.756517916        | 0.996361047        | 85.48846598 | 58.60497516 |
| OG0001975 | 0.867612159        | 0.998604502        | 85.44121198 | 58.66278783 |
| OG0002121 | 0.849208854        | 0.998408432        | 85.74209501 | 58.66543686 |
| OG0001833 | 0.645896284        | 0.998099798        | 84.33309921 | 58.70171005 |
| OG0002712 | 0.910499542        | 0.999490473        | 82.95986516 | 58.71628423 |
| OG0001949 | 0.912396783        | 0.999269182        | 83.03546291 | 58.72634464 |
| OG0002658 | 0.870276187        | 0.999246244        | 85.78126599 | 58.7443801  |
| OG0002516 | 0.679325054        | 0.995295158        | 82.21567096 | 58.75908906 |
| OG0002192 | 0.758786445        | 0.997851246        | 82.3542343  | 58.77689264 |
| OG0002547 | <b>0.467619366</b> | <b>0.701971177</b> | 83.56320809 | 58.77936581 |
| OG0002515 | 0.7773621          | 0.980187428        | 85.61397134 | 58.7878127  |
| OG0002665 | 0.808790953        | 0.998488401        | 85.94169878 | 58.83281847 |
| OG0002019 | 0.760296927        | 0.998476427        | 84.58542295 | 58.83369286 |
| OG0002001 | 0.72475508         | 0.999376069        | 85.6256043  | 58.84873767 |
| OG0002206 | 0.79444188         | 0.996241274        | 85.79987769 | 58.87359586 |
| OG0002102 | 0.91671403         | 0.999773587        | 86.11516637 | 58.89382374 |
| OG0002334 | 0.841589483        | 0.998955359        | 84.48957697 | 58.89733917 |
| OG0002220 | 0.912079909        | 0.999680321        | 85.431137   | 58.91019172 |
| OG0002676 | 0.807674056        | 0.992362376        | 85.87188526 | 58.9269377  |

|           |                    |                    |             |             |
|-----------|--------------------|--------------------|-------------|-------------|
| OG0002146 | <b>0.369106145</b> | <b>0.925441113</b> | 79.03940201 | 58.93421825 |
| OG0002444 | 0.906946822        | 0.999791868        | 85.97635549 | 58.9417644  |
| OG0002664 | 0.753065547        | 0.997360461        | 85.93861207 | 58.94711223 |
| OG0002059 | 0.690318745        | 0.991847001        | 86.1196543  | 58.97299948 |
| OG0002156 | 0.904173517        | 0.999412246        | 85.87849157 | 58.98823684 |
| OG0002572 | 0.804582748        | 0.9981685          | 85.12979406 | 58.99043441 |
| OG0002009 | 0.744557849        | 0.997067584        | 86.20856951 | 58.99766897 |
| OG0002390 | 0.750523674        | 0.994153076        | 85.20286598 | 59.00962383 |
| OG0001958 | 0.815119633        | 0.997705892        | 83.50182562 | 59.01185589 |
| OG0002583 | 0.878062309        | 0.999101624        | 83.46128654 | 59.0375335  |
| OG0002257 | 0.864156436        | 0.999491115        | 85.54170285 | 59.05084234 |
| OG0001920 | 0.768748724        | 0.99727217         | 86.17886479 | 59.05292255 |
| OG0002348 | 0.644021313        | 0.994546165        | 84.62114382 | 59.05655669 |
| OG0002212 | 0.664872662        | 0.99854728         | 86.2215799  | 59.11767946 |
| OG0002485 | 0.707488546        | 0.994251456        | 81.74023217 | 59.11777103 |
| OG0001904 | 0.718213046        | 0.990882987        | 83.13984607 | 59.12062562 |
| OG0002164 | 0.733866331        | 0.994329307        | 85.7053142  | 59.129448   |
| OG0002235 | 0.590083887        | 0.98879627         | 86.05326844 | 59.14204403 |
| OG0002553 | 0.633741192        | <b>0.924907919</b> | 79.61701731 | 59.1904823  |
| OG0002702 | 0.631566536        | 0.995484018        | 86.57519715 | 59.2134034  |
| OG0002633 | 0.890186646        | 0.998170898        | 85.9972848  | 59.23488204 |
| OG0002375 | 0.629916995        | 0.967141439        | 86.23871895 | 59.2506984  |
| OG0002409 | 0.934408977        | 0.999866945        | 85.6881562  | 59.26910599 |
| OG0001906 | 0.897787166        | 0.999657827        | 85.54198207 | 59.27511277 |
| OG0001954 | 0.620469513        | 0.975929181        | 82.86308484 | 59.28880256 |
| OG0001928 | 0.900232019        | 0.999642561        | 86.65541334 | 59.28981874 |

|           |                    |                    |             |             |
|-----------|--------------------|--------------------|-------------|-------------|
| OG0002655 | 0.86112894         | 0.998893736        | 84.71022784 | 59.33919797 |
| OG0002661 | 0.801578701        | 0.999476574        | 86.88004872 | 59.35835061 |
| OG0002265 | 0.817837253        | 0.996529385        | 85.77349695 | 59.41622453 |
| OG0002104 | 0.851410354        | 0.998876961        | 86.40226862 | 59.4236596  |
| OG0002298 | 0.773135722        | 0.996126285        | 81.55418523 | 59.49992598 |
| OG0002183 | 0.652263798        | 0.993886414        | 85.34526369 | 59.51362475 |
| OG0002608 | 0.806038361        | <b>0.884242664</b> | 86.46933704 | 59.56748696 |
| OG0002590 | 0.759023097        | 0.997724382        | 87.11918281 | 59.57807947 |
| OG0002574 | 0.841732559        | 0.998070894        | 86.89250073 | 59.58769591 |
| OG0001936 | 0.805589897        | 0.999343803        | 86.92941173 | 59.64019366 |
| OG0002528 | <b>0.125156372</b> | <b>0.166915194</b> | 77.2584977  | 59.65358719 |
| OG0002686 | 0.822162374        | 0.999411397        | 87.3030738  | 59.68626324 |
| OG0002012 | 0.626742628        | 0.988859027        | 83.87955198 | 59.74109775 |
| OG0002617 | 0.865279872        | 0.999083116        | 86.93396582 | 59.76181865 |
| OG0002119 | 0.913155913        | 0.999415177        | 77.06701829 | 59.76616921 |
| OG0002347 | 0.78103075         | 0.997339594        | 84.81492195 | 59.76977307 |
| OG0002051 | 0.882350304        | 0.998959085        | 85.11910708 | 59.79704248 |
| OG0002433 | 0.912192372        | 0.999829861        | 87.46692057 | 59.83540687 |
| OG0001985 | 0.888670107        | 0.999256613        | 86.22576135 | 59.84601713 |
| OG0002618 | 0.886078336        | 0.999188809        | 87.59421537 | 59.85716453 |
| OG0002319 | 0.895497592        | 0.99964217         | 85.26894616 | 59.90173052 |
| OG0002044 | <b>0.493282249</b> | <b>0.82139057</b>  | 85.17092193 | 59.93026461 |
| OG0002678 | 0.576047975        | 0.998974849        | 87.53429166 | 59.94753285 |
| OG0001873 | 0.660270023        | 0.977090738        | 86.74402642 | 59.95389583 |
| OG0002268 | 0.753754147        | 0.992941112        | 82.49423521 | 59.97541911 |
| OG0002074 | 0.748876482        | 0.998665005        | 86.42373642 | 59.98934095 |

|           |             |                    |             |             |
|-----------|-------------|--------------------|-------------|-------------|
| OG0002174 | 0.608596668 | 0.964517493        | 85.36838015 | 60.04510488 |
| OG0002452 | 0.779628737 | 0.998730476        | 87.78472244 | 60.05516517 |
| OG0002142 | 0.76441244  | 0.996246184        | 85.96294238 | 60.07273745 |
| OG0002286 | 0.883551196 | 0.998435396        | 86.56512426 | 60.08962927 |
| OG0001855 | 0.839603274 | 0.999323548        | 87.86854472 | 60.09395436 |
| OG0002370 | 0.881161997 | 0.999861724        | 87.92475063 | 60.10814375 |
| OG0002112 | 0.84134644  | 0.997830014        | 87.48045853 | 60.13272222 |
| OG0002356 | 0.710177695 | 0.996268748        | 87.51742429 | 60.14315738 |
| OG0002179 | 0.918915273 | 0.999211537        | 86.66246455 | 60.22337935 |
| OG0002026 | 0.867350153 | 0.99919447         | 87.28875125 | 60.27056312 |
| OG0002185 | 0.812120952 | 0.998096453        | 87.03659478 | 60.28534505 |
| OG0002446 | 0.692564492 | 0.99482863         | 84.81293703 | 60.28693316 |
| OG0001996 | 0.725097871 | 0.996883312        | 86.84365975 | 60.38725331 |
| OG0002341 | 0.878521886 | 0.999351166        | 88.37807417 | 60.41178612 |
| OG0002537 | 0.711873655 | 0.99435832         | 88.44361929 | 60.43144515 |
| OG0002329 | 0.635412842 | 0.988035137        | 87.03474373 | 60.43998751 |
| OG0001998 | 0.722919202 | 0.988618513        | 82.85966111 | 60.45463101 |
| OG0001894 | 0.801075671 | 0.997988937        | 86.1013268  | 60.46604727 |
| OG0002109 | 0.713965394 | 0.992606143        | 88.36607564 | 60.53623943 |
| OG0001951 | 0.717749524 | 0.990569767        | 78.82367565 | 60.60780311 |
| OG0002646 | 0.743195152 | 0.99726377         | 88.50593393 | 60.69137251 |
| OG0002031 | 0.602656563 | <b>0.933359709</b> | 80.65153172 | 60.73185631 |
| OG0002096 | 0.753963359 | 0.989728742        | 85.49576342 | 60.78320277 |
| OG0002124 | 0.734747872 | 0.996573257        | 88.21205501 | 60.80675071 |
| OG0002707 | 0.740097836 | 0.993761672        | 84.43697912 | 60.83372949 |
| OG0001902 | 0.851574997 | 0.9987406          | 88.46049594 | 60.84520345 |

|           |                    |                    |             |             |
|-----------|--------------------|--------------------|-------------|-------------|
| OG0001988 | 0.916409888        | 0.999257696        | 89.09044079 | 60.91134731 |
| OG0002717 | 0.827817582        | 0.996523887        | 87.09566236 | 60.93517255 |
| OG0002227 | 0.701481516        | 0.99246486         | 85.58045174 | 60.95861158 |
| OG0002647 | 0.919138455        | 0.99980561         | 80.58559713 | 61.01064295 |
| OG0002424 | <b>0.554686818</b> | <b>0.907457946</b> | 80.40523764 | 61.0298709  |
| OG0002166 | 0.76579831         | 0.99903954         | 89.19793839 | 61.06989084 |
| OG0001968 | 0.83277847         | 0.995264856        | 89.25976118 | 61.13941757 |
| OG0002241 | 0.718058876        | 0.994511813        | 89.44471735 | 61.17755465 |
| OG0002308 | 0.685749442        | 0.995167182        | 88.46616647 | 61.18552222 |
| OG0002015 | 0.683575284        | 0.990479714        | 87.99322002 | 61.25044223 |
| OG0002360 | 0.709306454        | 0.973171295        | 89.50126815 | 61.27159411 |
| OG0002321 | 0.878944463        | 0.999788307        | 89.32975029 | 61.30236358 |
| OG0002077 | 0.67800121         | 0.993432386        | 89.69249256 | 61.31218822 |
| OG0002585 | 0.650887433        | 0.996691443        | 89.61295246 | 61.33588394 |
| OG0001978 | 0.709032327        | 0.989687273        | 89.80596303 | 61.3548164  |
| OG0002182 | 0.808067653        | 0.998987453        | 88.08466786 | 61.39019652 |
| OG0002724 | 0.816026475        | 0.997279592        | 86.19931802 | 61.44005829 |
| OG0001944 | 0.740339744        | 0.995668668        | 84.22385158 | 61.46657101 |
| OG0001841 | <b>0.511175874</b> | <b>0.838732849</b> | 87.13818339 | 61.51828224 |
| OG0001921 | <b>0.272734571</b> | <b>0.504005645</b> | 83.45677253 | 61.52140106 |
| OG0002224 | <b>0.557766257</b> | <b>0.954710792</b> | 82.88908536 | 61.61028835 |
| OG0002053 | 0.626860491        | <b>0.939232834</b> | 86.6206423  | 61.62884772 |
| OG0002057 | 0.865249156        | 0.995902758        | 88.27086038 | 61.7002455  |
| OG0002020 | 0.909611718        | 0.99908491         | 90.19399308 | 61.70665477 |
| OG0002058 | 0.760962466        | 0.995851733        | 82.9145634  | 61.78367355 |
| OG0001925 | 0.640852456        | 0.98971082         | 89.16174365 | 61.79246148 |



|           |                    |                    |             |             |
|-----------|--------------------|--------------------|-------------|-------------|
| OG0002281 | 0.624844019        | 0.995484715        | 89.399243   | 61.7927011  |
| OG0001952 | 0.896119274        | 0.999661883        | 88.74320019 | 61.98429821 |
| OG0002276 | 0.798364657        | 0.999559984        | 90.31721194 | 62.03419138 |
| OG0002155 | <b>0.558821534</b> | <b>0.881992333</b> | 86.67913782 | 62.21744641 |
| OG0002214 | 0.705054854        | 0.993110951        | 86.71623306 | 62.24093689 |
| OG0002259 | 0.717074988        | 0.99452343         | 82.55098594 | 62.2434114  |
| OG0001872 | 0.763463576        | 0.999420851        | 90.22446758 | 62.25877468 |
| OG0002496 | 0.873072551        | 0.999355363        | 90.54016996 | 62.28187666 |
| OG0002175 | 0.796026333        | 0.996619754        | 85.29943988 | 62.39629526 |
| OG0002685 | 0.920734615        | 0.999375603        | 89.75544375 | 62.42601539 |
| OG0002490 | 0.679495405        | 0.977800935        | 89.28124566 | 62.47001252 |
| OG0001956 | 0.574562473        | 0.97057927         | 88.58619792 | 62.6484658  |
| OG0002482 | 0.606268474        | 0.994872386        | 91.82772934 | 62.85479841 |
| OG0002387 | 0.678927289        | 0.991424452        | 89.96350755 | 62.86537538 |
| OG0002063 | 0.91057147         | 0.999330189        | 89.41443004 | 62.90063907 |
| OG0001994 | 0.856707482        | 0.998573944        | 87.46538904 | 62.92131992 |
| OG0002199 | 0.914797083        | 0.9968542          | 90.08138379 | 62.97284975 |
| OG0002226 | 0.655972145        | 0.994017454        | 89.90050459 | 63.03143836 |
| OG0002233 | 0.629211172        | 0.985366081        | 85.09261807 | 63.03208766 |
| OG0002561 | <b>0.50431886</b>  | <b>0.948365283</b> | 90.72242194 | 63.29702412 |
| OG0002579 | 0.65782096         | 0.992033407        | 90.38854904 | 63.37258959 |
| OG0002083 | 0.697532823        | 0.986471764        | 85.56062453 | 63.54255341 |
| OG0002249 | 0.651832049        | 0.989783818        | 87.07354934 | 63.61698242 |
| OG0002527 | 0.723890711        | 0.991800139        | 90.38301232 | 63.72689867 |
| OG0002229 | <b>0.485176475</b> | <b>0.81155179</b>  | 92.46850718 | 63.74009518 |
| OG0002084 | 0.657111083        | 0.992888459        | 90.7084087  | 63.87841945 |

|           |                    |                    |                    |                    |
|-----------|--------------------|--------------------|--------------------|--------------------|
| OG0002080 | <b>0.508748232</b> | 0.984599766        | 91.5673035         | 63.88848226        |
| OG0002292 | 0.698820278        | 0.99234435         | 93.1168581         | 63.90481856        |
| OG0002420 | 0.746551898        | 0.99560309         | 90.64474242        | 63.95021533        |
| OG0002573 | 0.886960993        | 0.999325208        | 93.35223958        | 64.23281393        |
| OG0002673 | 0.674173254        | 0.987536941        | 86.47538865        | 64.39507711        |
| OG0002525 | <b>0.268442081</b> | <b>0.616341124</b> | 71.0450817         | 64.40216884        |
| OG0002369 | 0.76116533         | 0.997304366        | 90.49205377        | 64.47732357        |
| OG0002172 | 0.724583295        | 0.995781109        | 89.50804152        | 64.73219169        |
| OG0002037 | 0.907202299        | 0.999287752        | 92.05655153        | 64.87765906        |
| OG0001940 | 0.94196283         | 0.999792184        | 94.63946494        | 65.15941169        |
| OG0002603 | 0.676722833        | 0.990838543        | 91.10860956        | 65.7866929         |
| OG0002038 | 0.922040431        | 0.999175716        | 90.6679321         | 66.08390762        |
| OG0002568 | <b>0.13067732</b>  | <b>0.093295689</b> | 92.66421298        | 66.11887491        |
| OG0002097 | 0.950132865        | 0.999566525        | 89.51606624        | 66.17805328        |
| OG0001995 | 0.662002915        | 0.99016124         | 93.31503247        | 66.23964379        |
| OG0002188 | 0.794786406        | 0.996625437        | 86.43645505        | 66.67458022        |
| OG0002613 | 0.738161557        | 0.996383414        | 93.85286192        | 66.74533619        |
| OG0002326 | 0.578193457        | 0.98268267         | <b>97.82274567</b> | <b>66.86826589</b> |
| OG0001899 | 0.934286623        | 0.999728392        | <b>96.77433315</b> | <b>66.99125657</b> |
| OG0002312 | 0.685214421        | 0.99050879         | 90.7711198         | <b>67.37509837</b> |
| OG0002294 | 0.825331384        | 0.997989031        | 91.82449947        | <b>67.71138247</b> |
| OG0002143 | 0.641984889        | 0.984644761        | 95.43655242        | <b>67.81032272</b> |
| OG0001887 | <b>0.5143261</b>   | <b>0.86233721</b>  | <b>99.06338175</b> | <b>67.86387257</b> |
| OG0002431 | 0.760115684        | 0.987447927        | 93.2178304         | <b>68.24762623</b> |
| OG0002008 | 0.751767604        | 0.991109452        | 94.91015648        | <b>68.71395745</b> |
| OG0002723 | 0.688077902        | 0.979702279        | 91.27590115        | <b>68.95134671</b> |

|           |                    |                    |                    |                    |
|-----------|--------------------|--------------------|--------------------|--------------------|
| OG0002280 | <b>0.478639818</b> | <b>0.906296162</b> | 89.16736236        | <b>69.37351129</b> |
| OG0001900 | 0.689893397        | 0.985435974        | <b>96.38902567</b> | <b>70.01633676</b> |
| OG0001989 | 0.849394652        | 0.998143322        | 94.90832401        | <b>70.71080872</b> |
| OG0002011 | <b>0.513000597</b> | <b>0.919977226</b> | <b>97.46594803</b> | <b>72.99190866</b> |
| OG0002140 | 0.746336735        | 0.995418567        | <b>96.95703567</b> | <b>76.22013084</b> |
| OG0002243 | <b>0.355747543</b> | <b>0.929216454</b> | 85.83522748        | <b>79.36373446</b> |
| OG0001836 | <b>0.431439354</b> | <b>0.956756611</b> | <b>97.36787256</b> | <b>79.92744223</b> |
| OG0002660 | <b>0.507174089</b> | 0.980633852        | 93.55283131        | <b>81.9718949</b>  |
| OG0002599 | <b>0.065413632</b> | <b>0.378178032</b> | 85.79917205        | <b>82.87929769</b> |
| OG0001934 | <b>0.09690216</b>  | <b>0.507641885</b> | 85.8045383         | <b>83.49563452</b> |
| OG0002726 | <b>0.336528472</b> | 0.968724218        | 87.32204755        | <b>84.78110562</b> |
| OG0002054 | <b>0.198600832</b> | <b>0.812742042</b> | 93.6045791         | <b>85.56434624</b> |
| OG0002449 | <b>0.138868854</b> | <b>0.706646256</b> | 88.59070257        | <b>87.68587229</b> |
| OG0002691 | <b>0.388805112</b> | 0.98373882         | 91.21807609        | <b>88.81985244</b> |
| OG0002095 | 0.728524485        | 0.998546377        | <b>98.05794404</b> | <b>92.75618423</b> |
| OG0002025 | <b>0.285835353</b> | <b>0.958362123</b> | <b>99.50505746</b> | <b>93.93541872</b> |
| OG0002244 | <b>0.103573676</b> | <b>0.810147187</b> | <b>96.46397506</b> | <b>94.61056258</b> |
| OG0001972 | <b>0.223403299</b> | <b>0.928428224</b> | <b>99.09640734</b> | <b>96.57713212</b> |
| OG0002035 | <b>0.174225328</b> | <b>0.901869213</b> | <b>102.2427201</b> | <b>97.46274648</b> |
| OG0001991 | <b>0.262722003</b> | 0.973846619        | <b>100.7131538</b> | <b>99.7416712</b>  |
| OG0002592 | <b>0.109420301</b> | 0.972486848        | <b>103.1878536</b> | <b>105.9758994</b> |
| OG0002607 | <b>0.077309813</b> | 0.963100086        | <b>102.811395</b>  | <b>106.0277268</b> |
| OG0002256 | <b>0.015962588</b> | 0.759433506        | <b>102.7019782</b> | <b>107.5748154</b> |

---

**Supplementary Table S9.** Model selection between species networks. Bold front indicates the optimal network.

| Reticulations | lnL                      | Branch lengths | <i>k</i>  | AIC                | $\Delta$ AIC |
|---------------|--------------------------|----------------|-----------|--------------------|--------------|
| 0             | -1077.61188852455        | 8              | 8         | 2171.223777        | 74.23576904  |
| 1             | -1049.99492872625        | 9              | 10        | 2119.989857        | 23.00184945  |
| 2             | -1042.51504061667        | 10             | 12        | 2109.030081        | 12.04207323  |
| 3             | -1036.65975450474        | 11             | 14        | 2101.319509        | 4.331501004  |
| 4             | -1034.28901688722        | 12             | 16        | 2100.578034        | 3.590025769  |
| <b>5</b>      | <b>-1030.49400400281</b> | <b>13</b>      | <b>18</b> | <b>2096.988008</b> | <b>0</b>     |
| 6             | -1030.92900896427        | 14             | 20        | 2101.858018        | 4.870009923  |
